1 **Subcellular localization of mutant P23H rhodopsin in an RFP fusion knockin mouse**  
2 **model of retinitis pigmentosa**

3

4 Michael A. Robichaux<sup>1,3</sup>, Vy Nguyen<sup>1</sup>, Fung Chan<sup>1</sup>, Lavanya Kailasam<sup>1</sup>, Feng He<sup>1</sup>, John H.  
5 Wilson<sup>1,2</sup>, Theodore G. Wensel<sup>1</sup>

6

7 <sup>1</sup> Verna and Marrs McLean Department of Biochemistry and Molecular Biology, Baylor College  
8 of Medicine, 1 Baylor Plaza, Houston, TX, 77030

9 <sup>2</sup> Department of Molecular and Human Genetics, Baylor College of Medicine, 1 Baylor Plaza,  
10 Houston, Texas, 77030

11 <sup>3</sup> Departments of Ophthalmology and Biochemistry, West Virginia University, 108 Biomedical  
12 Road, Morgantown, WV, 26506

13

14 Short title

15 Subcellular analysis of a P23H rhodopsin RFP fusion mouse model

16

17 Corresponding author:

18 Theodore G. Wensel, [twensel@bcm.edu](mailto:twensel@bcm.edu)

19

20 The authors have declared no conflicts of interest.

21 **Abstract**

22           The P23H mutation in rhodopsin (Rho), the visual pigment protein in rod photoreceptor  
23 neurons, is the most common genetic cause of autosomal dominant retinitis pigmentosa  
24 (adRP), a retinal disease that causes blindness. Despite multiple studies in animal models, the  
25 subcellular details of the fate of misfolded mutant Rho in rod photoreceptors have not been  
26 completely defined. We generated a new mouse model of adRP, in which the P23H-Rho mutant  
27 allele is fused to the fluorescent protein Tag-RFP-T (P23HhRhoRFP). In heterozygotes, outer  
28 segments formed, and WT rhodopsin was properly localized there, but mutant P23H-Rho  
29 protein was specifically mislocalized in the inner segments of rods. Despite this cellular  
30 phenotype, the P23HhRhoRFP heterozygous mice exhibited only slowly progressing retinal  
31 degeneration; in ERG recordings, scotopic a-wave amplitudes were reduced by 24% and 26%  
32 at 30 days and 90 days respectively, and the corresponding scotopic b-waves by 18% and 24%.  
33 Outer nuclear layer thickness was still 80% of WT at 90 days, but at 364 days had declined to  
34 40% of WT. Transmission electron microscopy revealed greatly expanded membrane lamellae  
35 in the inner segment, and by fluorescence imaging, we determined that the mislocalized  
36 P23HhRhoRFP was contained in greatly expanded endoplasmic reticulum (ER) membranes.  
37 TUNEL staining revealed a slow pace of cell death involving chromosomal endonucleolytic  
38 degradation. Quantification of mRNA for markers of ER stress and the unfolded protein  
39 response revealed little or no increases in levels of messages encoding the proteins BiP,  
40 CHOP, ATF6, XBP1, PERK, Eif2 $\alpha$  and Derlin-1, but a decreased level of total *Rhodopsin*  
41 (mouse + human) mRNA levels. The decline in the rate of cell death after an initial burst  
42 suggests that P23HhRhoRFP mutant rods undergo an adaptative process that prolongs survival  
43 despite gross P23HhRhoRFP protein accumulation in the ER. Because of its slowly progressing  
44 nature, and easy visualization of the mutant protein, the P23H-Rho-RFP mouse may represent  
45 a useful tool for the future study of the pathology and treatment of P23H-Rho and adRP.

46



## 47 **Introduction**

48           Retinitis pigmentosa (RP) is a hereditary disease of photoreceptor neurons of the retina  
49 that causes night blindness, retinal degeneration and, eventually, complete blindness. RP  
50 accounts for half of the known cases of all inherited retinal disease (1), affecting 1:4000 in the  
51 US (2). Rod and cone photoreceptors, the light-sensing cells in the vertebrate retina are  
52 polarized neurons with a specialized outer segment (OS) sensory cilium. The OS is the site of  
53 phototransduction, the pathway initiated by the photopigment rhodopsin (Rho) in rods  
54 photoreceptors and the cone opsins in cones.

55           Rho is a prototypical G protein-coupled receptor (GPCR) that is densely packaged as an  
56 integral transmembrane protein into the lipid bilayers of membrane discs that fill the rod OS  
57 cilium. Each mouse OS contains ~800 discs, and Rho comprises >90% of the total membrane  
58 protein content in the OS (3, 4). Every day ~10% of the OS membrane mass in mammalian rods  
59 is renewed, as the distal OS discs are shed and engulfed by retina pigment epithelium (RPE)  
60 phagocytosis (5, 6), and new discs are generated at the base of the OS (7, 8). Thus, in each  
61 mouse rod photoreceptor ~2.4 million Rho molecules must be synthesized daily in the inner  
62 segment (IS), the biosynthetic compartment of rods, to be delivered to the OS cilium to sustain  
63 this renewal (3). This trafficking load – including Rho, other visual proteins, and lipids - must  
64 pass through a thin, 300 nm connecting cilium (CC) bridge located between the IS and OS. The  
65 CC has a cylindrical 9 microtubule doublet cytoskeletal core similar to the structure of the  
66 transition zone of other primary cilia (9-11), that extends into the OS and nucleates from a pair  
67 of basal body (BB) centrioles located at the distal end of the IS in rods.

68           The correct localization of Rho throughout the highly specialized compartments of rods  
69 is necessary to satisfy the high trafficking rate of Rho molecules in rods, and maintain  
70 homeostasis and cell survival (12). Thus, rods are susceptible to genetic mutations to Rho itself,  
71 which are the leading cause of autosomal dominant RP (adRP) (13). One point mutation that

72 encodes a proline-to-histidine change at codon 23 (P23H) in the N-terminus of Rho is the most  
73 common single mutation cause of adRP in North America (14, 15).

74 P23H-Rho is a misfolding mutation that causes mislocalization of P23H-Rho protein in  
75 cell culture from the plasma membrane to dense endoplasmic reticulum (ER) cytoplasmic  
76 aggregates (16-18). The deleterious effect of the P23H-Rho mutation has been extensively  
77 studied in rods in a wide range of animal models, where it causes rod cell death and retinal  
78 degeneration with different degrees of severity (e.g., (19-21). In transgenic P23H-Rho frog rods,  
79 the mutant *Xenopus*-P23H-Rho protein is specifically retained and mislocalized in the IS ER  
80 (22), while transgenic bovine-P23H-Rho protein in frog rods caused light-induced vesiculation in  
81 the IS (23). A zebrafish model expressing mouse-P23H-Rho caused photoreceptor  
82 degeneration, abnormal rod OS formation and P23H-Rho protein mislocalization throughout the  
83 malformed rods in adult fish retina (24).

84 Transgenic and knockin P23H-Rho mouse models have variable retinal degeneration  
85 rates that coincide with inconsistent photoreceptor cell phenotypes across models (25-33).  
86 Transgenic P23H-Rho mice generated in a Rho null background have severely dysmorphic  
87 rods, in which mutant P23H-Rho is mislocalized in endoplasmic reticulum (ER) surrounding the  
88 nucleus (30). In contrast, a knockin mouse model, featuring a mouse-P23H-Rho knockin allele,  
89 had dramatic mutant P23H-Rho protein degradation and no detectable ER mislocalization or  
90 accumulation phenotype (28). Rod degeneration in the P23H-Rho knockin heterozygotes was  
91 fairly rapid (the rod population was reduced by 50% before P40 (34)) but even more severe in  
92 homozygotes. Notably, the undegraded P23H-Rho protein in the P23H-Rho knockin rods  
93 normally localized to the OS and caused abnormal OS disc formation (28, 34). One challenge  
94 for characterizing the fate of misfolded P23H-Rho and testing its effects on different therapeutic  
95 approaches, is the difficulty in distinguishing WT rhodopsin from a variant that differs by one  
96 amino acid residue. We previously generated a P23H-Rho-GFP fusion knockin mouse to easily  
97 visualize the mutant protein in rods, and we observed a gross mislocalization of mutant P23H-

98 Rho-GFP in the IS (35). Furthermore, we found that the mutant fusion protein was largely  
99 degraded; however, we did not characterize any subcellular phenotypes in single rods on a  
100 nanoscopic level in the P23H-Rho-GFP mouse (21)

101 For a more in-depth characterization we have generated a new P23H-Rho mouse model  
102 in order to study mutant P23H-Rho protein localization and dynamics, and to serve as a  
103 platform for testing gene-based and other therapies. The latter goal is best achieved with a  
104 model that has a relatively slow rate of retinal degeneration in line with the slowly progressive  
105 course of human vision loss in adRP, which would permit long-term studies. In addition, a  
106 relatively non-perturbing tag greatly benefits the testing of therapeutic interventions and  
107 strategies.

108 In this study we introduce a new knockin mouse model of P23H-Rho adRP, in which the  
109 mutant P23H-Rho protein is fused to a photostable Tag-RFP-T (36) fusion tag, which we have  
110 used to study the mislocalization of the protein. We have also studied the morphological and  
111 functional changes that accompany a slowly progressing retinal degeneration

112

## 113 **Results**

### 114 Generation of the P23H-hRho-RFP knockin mouse

115 We designed a new mouse line in which we introduced into the mouse *Rho* locus, the  
116 human rhodopsin gene (introns and exons) encoding both the P23H mutation in the first exon  
117 and a fusion to Tag-RFP-T at the C-terminus. Tag-RFP-T is a red fluorescent protein (excitation  
118 maximum = 555 nm, emission maximum = 584 nm) based on a naturally occurring anemone  
119 protein engineered for both bright fluorescence and enhanced photostability (36). Notably, Tag-  
120 RFP-T fluorescence is compatible with GFP fluorescence for multiplex detection, and it has  
121 been used for multiple applications since its design, including as a fluorescent fusion marker  
122 (37-39).

123 In addition, we added an additional 1D4 signaling sequence to the carboxy-terminus of  
124 the P23H-hRho + Tag-RFP-T fusion allele (Fig 1A-B). Our rationale was that the C-terminal  
125 RFP fusion tag in the expressed P23H-hRho-Tag-RFP-T (hereafter P23HhRhoRFP) protein  
126 may inhibit the endogenous Rho 1D4 sequence leading to artifacts not attributable to the P23H  
127 mutation. The additional 1D4 sequence was also shown to be necessary for normal trafficking of  
128 transgenic Rho-Dendra fusion protein in *Xenopus laevis* rods (40).

129 The P23H-hRho-TagRFP knock-in mice were generated the same way we previously  
130 generated P23H-hRho-GFP knock-in mice (35), by gene targeting in the HPRT<sup>-</sup> embryonic stem  
131 (ES) cell line AB2.2 123, which was derived from mouse strain 129SvEv, essentially as  
132 described previously (41, 42). We introduced the P23H mutation into the targeting vector by  
133 site-directed mutagenesis (QuikChange<sup>®</sup>, Stratagene). An IScel recognition site was  
134 engineered into the middle of the first intron in the rhodopsin gene at position 1340 from the  
135 start of translation, but it was not used in the experiments described here. The Darwin  
136 Transgenic Core Facility, Baylor College of Medicine, electroporated ES cells, selected for  
137 HPRT<sup>+</sup>TK<sup>-</sup> cells and injected correctly targeted ES cells into blastocysts from albino C57BL/6-  
138 Tyr<sup>c-Brd</sup> mice (43). Founder mice carrying the HPRT-P23H-hRho-TagRFP allele were crossed to  
139 GDF-9-iCre mice (44) to remove the HPRT minigene. P23H-hRho-TagRFP (hereafter “P23H-  
140 RFP” in reference to the knockin allele) mice were extensively backcrossed to C57BL/6 mice.  
141 We validated that the knockin was successful by sequencing genomic DNA from the knockin  
142 mouse. We verified expression of the P23HhRhoRFP fusion by fluorescence microscopy of  
143 retinas and by immunoblotting (Fig. 1, Fig. 2).

144 We used P23H-RFP/+ heterozygous mouse retinas to examine the expression of the  
145 mutant fusion protein alongside the WT mouse Rho protein from the wild-type allele (Fig 1B).  
146 Both WT mouse Rho protein and the product of the knockin allele were detected in P23H-RFP/+  
147 retinal lysates by probing with anti-1D4 antibody. The P23HhRhoRFP fusion protein was

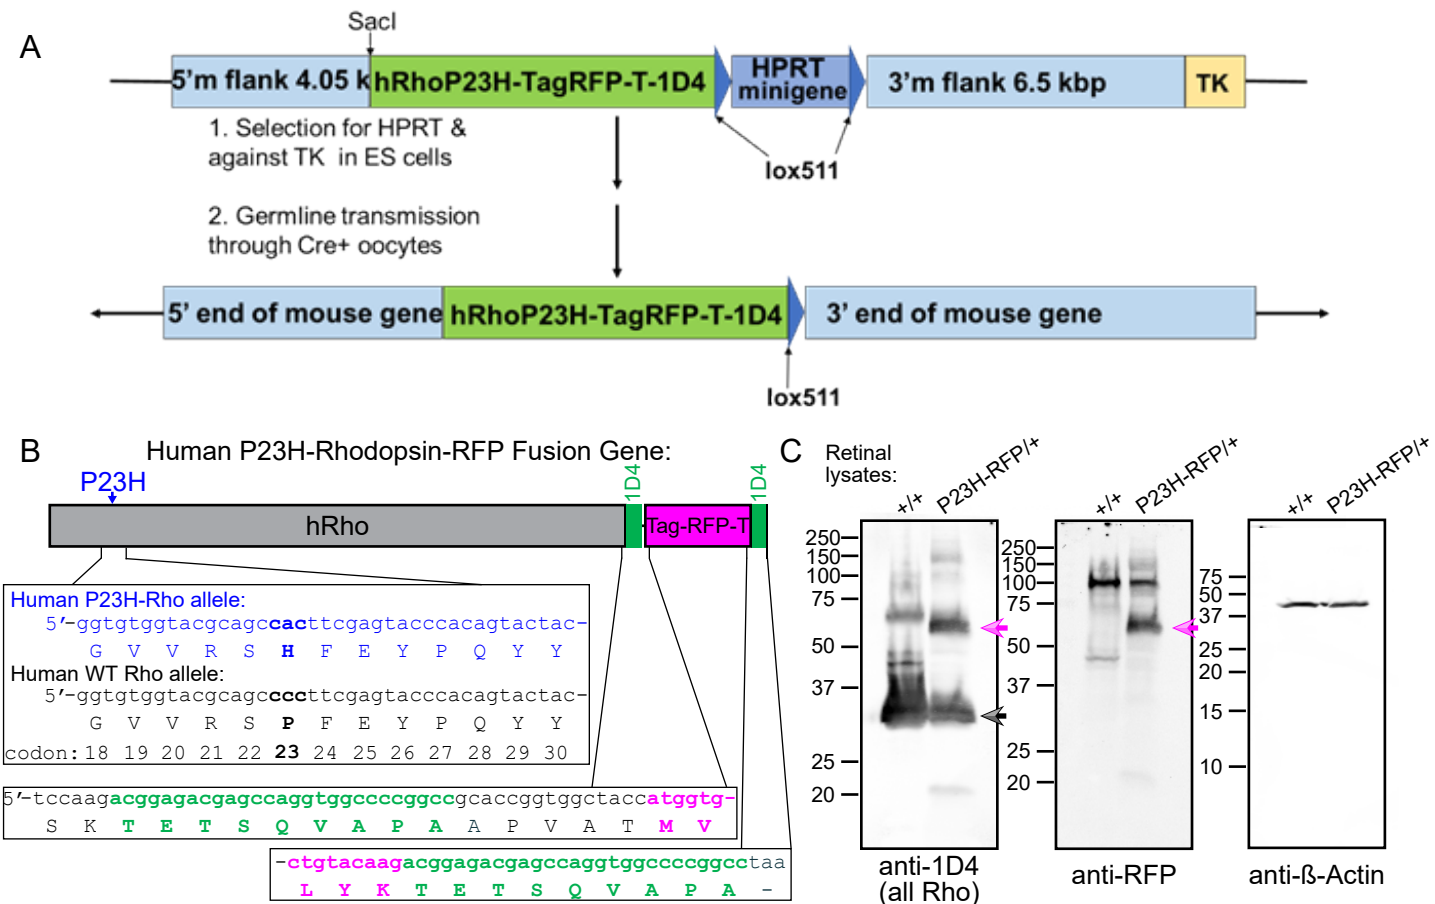

**Figure 1. Construction and validation of the P23H-hRho-TagRFP-T knockin mouse.** (A) Targeting construct used in embryonic stem cells and resulting gene structure after germline transmission. (B) A map of the knock-in human P23H-rhodopsin-RFP fusion gene. A portion of the sequence of exon 1 from the P23H-Rho allele in the fusion gene (blue) is aligned to the same human wild-type (WT) Rho allele sequence (black). The mutated codon 23 is in **bold** font. The transition sequence from the 1D4 terminal signal sequence to the Tag-RFP-T with a short linker sequence is shown in the middle sequence panel and the C-terminal sequence with the extra 1D4 epitope sequence appended to the end Tag-RFP-T prior to the stop codon. (C) Western blot confirmation of the P23HhRhoRFP fusion protein expression in P23H-RFP<sup>+/+</sup> heterozygous retinas. Retinal lysates are from a wild-type (+/+) mouse, age P22, and a P23H-RFP<sup>+/+</sup> mouse, age 45; 100 μg of total protein from each lysate was loaded onto SDS-PAGE gels. Blot membranes were probed with either of the following antibodies: anti-1D4, anti-RFP or anti-beta (β)-actin (a loading control). Blot scans for the protein ladder were used to mark molecular weight sizes (in kilodaltons, kDa) on the left of each blot image. The ~65 kDa P23HhRhoRFP fusion protein band is present in the P23H-RFP<sup>+/+</sup> lane in both anti-1D4 and anti-RFP blot scans (magenta arrows). The monomeric mouse Rho protein band is in both lanes in the anti-1D4 blot scan (black arrow). Higher MW species are formed by rhodopsin multimerization.

148 detected as a strong ~65 kDa band specifically in P23H-RFP/+ lysates using both anti-1D4 and  
149 anti-RFP antibodies, verifying robust expression.

150

151 P23HhRhoRFP protein was mislocalized in rod photoreceptor neurons.

152 We next tested the fluorescence pattern of the P23HhRhoRFP fusion protein in the  
153 retinas of both P23H-RFP/+ heterozygous and P23H-RFP/P23H-RFP homozygous mice. The  
154 RFP fluorescence is evident in the outer photoreceptor layers of retinal sections from both  
155 heterozygotes and homozygotes at age P30 (Fig 2A). In a confocal z-projection of a retinal  
156 section from a P30 P23H-RFP/+ heterozygote, P23HhRhoRFP is most prominently located in  
157 brightly fluorescent puncta or “aggregates” within the regions of the inner segments and outer  
158 segments of photoreceptors (Fig 2B). Less prominent but visible in this same section is P23H-  
159 Rho-RFP fluorescence at the photoreceptor synapses of the outer plexiform layer (OPL) and in  
160 the cytoplasm surrounding the photoreceptor nuclei of the outer nuclear layer (ONL) (Fig 2B).  
161 Compared to both WT and heterozygotes, the ONL of P30 homozygotes was noticeably thinner  
162 based on DAPI+ nuclei staining (Fig 2C). P23HhRhoRFP aggregates were also clearly visible in  
163 the ONL of the homozygous retina.

164 We crossed our new P23H-RFP mouse line with wild-type hRho-GFP mouse lines for  
165 dual fluorescent tag multiplex imaging. This approach allowed us to investigate the subcellular  
166 dynamics of the mutant P23HhRhoRFP protein relative to hRho-GFP without the P23H  
167 mutation. In addition to the hRho-GFP fusion mouse that we previously reported (41), we also  
168 generated a new line with an additional 1D4 signal sequence added to the end of the EGFP  
169 sequence (“hRho-GFP-1D4”). As heterozygotes, we could not discriminate any phenotypic  
170 difference between these GFP fusion mice.

171 Both GFP fusion lines were crossed to our new P23H-RFP knockin mouse. In confocal  
172 images of retinal sections from an adult hRho-GFP-1D4/P23H-RFP heterozygote we observed  
173 a drastic localization difference between hRho-GFP-1D4, which correctly populated the rod

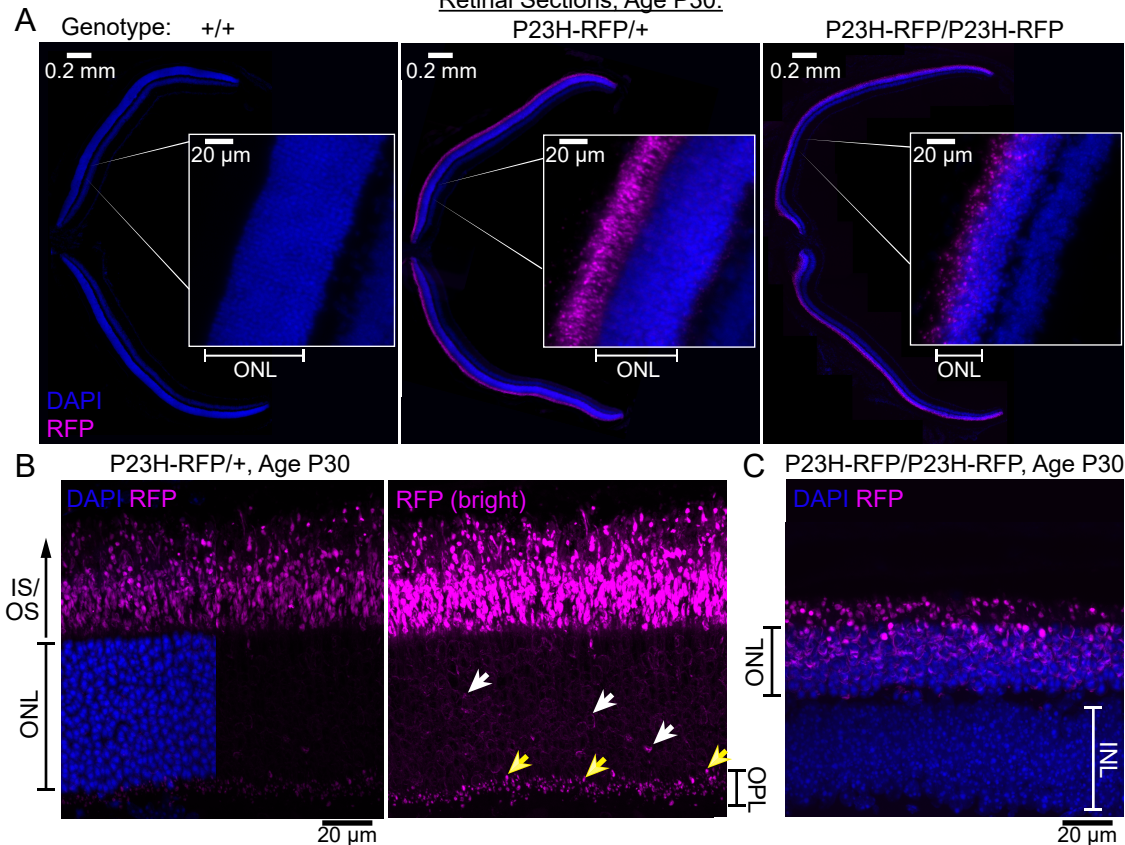

**Figure 2. Localization of RFP fluorescence in the P23H-hRho-RFP knockin mouse retina.** (A) Widefield fluorescence images of mouse retinal cryosections from age-matched P30 wild-type ( $+/+$ ), heterozygous (P23H-RFP/ $+$ ) and homozygous knockin mice (P23H-RFP/P23H-RFP). Sections were counterstained with DAPI to label nuclei in the retina (blue). RFP fluorescence from the mutant P23HhRhoRFP fusion protein is shown in magenta. Magnified regions from each section are insets, and the outer nuclear layer (ONL) of each retina, which is the location of the DAPI+ photoreceptor nuclei, is demarcated. (B) Confocal z-projection image of a retinal cryosection from a P30 heterozygous P23H-RFP/ $+$  mouse. The brightest RFP signal is in the outer photoreceptor layers, the inner segment and outer segment region (IS/OS), where P23HhRhoRFP protein is localized in aggregates. In the same image, with the gain of the RFP signal raised to saturation, additional P23HhRhoRFP protein is observed in the rod photoreceptor synapses within the outer plexiform layer (yellow arrows). To a lesser degree, P23HhRhoRFP is also localized in the ONL, in the cytoplasm surrounding the photoreceptor nuclei (white arrows). (C) Confocal z-projection through a retinal cryosection from a P30 P23H-RFP/P23H-RFP homozygote. The width of the DAPI-positive ONL is thinner compared to the heterozygote. In the homozygous retina, mutant P23HhRhoRFP fusion protein is also more prominently localized in the ONL compared to the heterozygote. INL = inner nuclear layer.



174 photoreceptor OS cilia, and the P23HhRhoRFP aggregates, which were prominently  
175 mislocalized in the rod inner segment layer (Fig 3A). We examined retinal sections from this  
176 same hRho-GFP-1D4/P23H-RFP heterozygous mouse line with structured illumination  
177 microscopy (SIM) superresolution imaging and observed a clear segregation of P23HhRhoRFP  
178 from the hRho-GFP-1D4 in the OS cilia (Fig 3B). Interestingly, in retinal sections from the other  
179 heterozygous hRho-GFP/P23H-RFP mice, we found evidence of hRho-GFP mislocalization in  
180 the same region as the P23HhRhoRFP aggregates in what appear to be distinct but interwoven  
181 membrane compartments (Fig 3C). This result suggests that the added C-terminal 1D4  
182 sequence prevents hRho-GFP from being mislocalized with P23HhRhoRFP in the GFP/RFP  
183 heterozygous animals.

184 To visualize the location of the P23HhRhoRFP inner segment aggregates relative to the  
185 connecting cilium (CC) and basal body (BB) we used centrin as an antibody marker for the CC  
186 and BB (45, 46) in retinal sections from P23H-RFP/+ mice and imaged by SIM. At age P14, we  
187 found many examples of P23HhRhoRFP aggregates that were located just proximal to the BB  
188 (Fig 4A). We observed this same sub-BB localization of the RFP aggregates in retinal sections  
189 from age P30 P23H-RFP/+ mice (Fig 4B), with some examples of P23HhRhoRFP fluorescence  
190 overlapping into the BB region. In retinas from both ages, the RFP fluorescence pattern within  
191 these P23HhRhoRFP clumps was discontinuous with dark patches. Morphologically, the  
192 P23HhRhoRFP fluorescent aggregates in P14 retina had a compact and defined elliptical shape  
193 compared to the aggregates in the P30 retina which appeared more elongated and less  
194 structured.

195 Taken together, fluorescence images of P23H-RFP retinas at different ages demonstrate  
196 that the P23HhRhoRFP mutant fusion protein was excluded from the OS and mislocalized  
197 within aggregates near the BB in the IS and to a lesser degree in the ONL and the  
198 photoreceptor synapses. This result suggests that the mutant fusion protein is accumulating in a  
199



A mouse: hRho-GFP-1D4/P23H-RFP, age 3 weeks

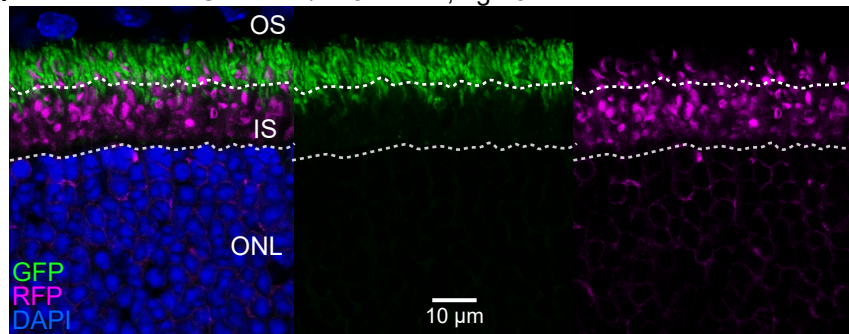

B mouse: hRho-GFP-1D4/P23H-RFP, age 6 weeks

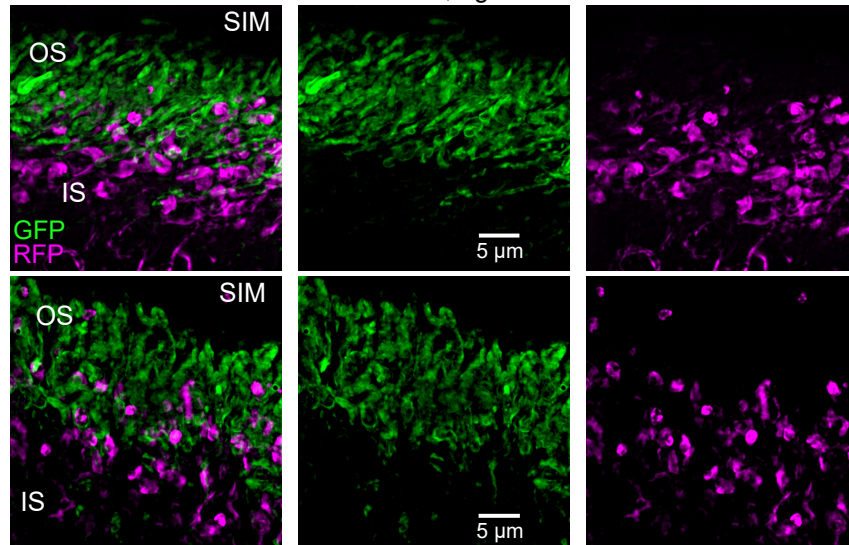

C mouse: hRho-GFP/P23H-RFP, age P30

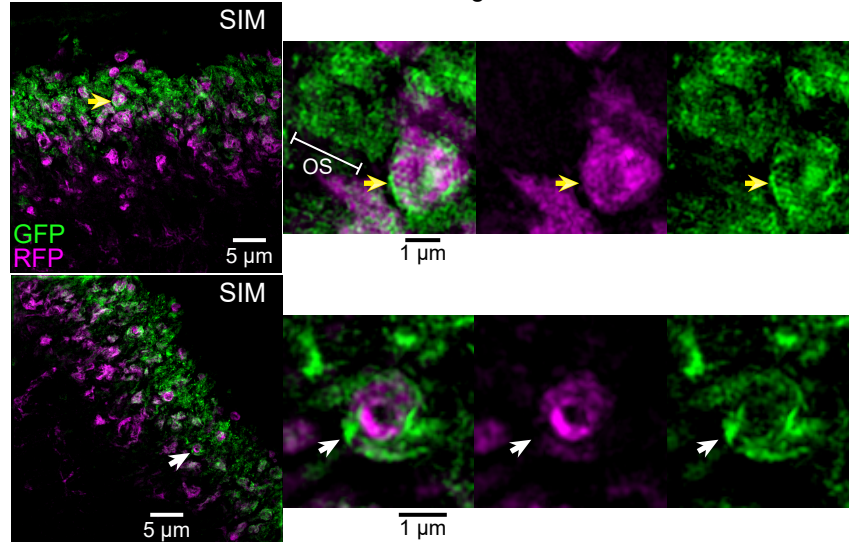

**Figure 3. P23HhRhoRFP+ fusion aggregates are localized in the inner segments of rod photoreceptor neurons.** (A) In a confocal z-projection image of a retinal section from the hRho-GFP-1D4/P23H-RFP heterozygous mouse retina, at 3 weeks of age, the wild-type hRho-GFP fusion (green), which has an additional C-terminal 1D4 signal sequence, is correctly localized to the outer segments (OS) of rod neurons. In this retina, RFP+ aggregates containing mutant P23HhRhoRFP protein (magenta) are primarily located in the inner segments (IS) of rods and almost entirely segregated from the GFP+ OS layer. White dotted lines in the figure demarcate the OS/IS boundary and the IS/outer nuclear layer (ONL) boundary. (B) In SIM micrographs of retinal sections from the same heterozygous mouse line at age 6 weeks, GFP+ OS and RFP+ IS aggregates remain segregated with no apparent co-localization. (C) In SIM images of retinal sections from an alternate GFP/RFP heterozygote at age P30, in which the wild-type hRho-GFP fusion does not have an additional 1D4 signal peptide, the GFP fluorescence is not exclusively located in the OS layer, but rather is partially mislocalized with P23HhRhoRFP. In a magnified example, hRho-GFP is co-localized around and within a P23HhRhoRFP aggregate (yellow arrows). In another magnified example, hRho-GFP is wrapped around an P23HhRhoRFP aggregate (white arrow).

A mouse: P23H-RFP/+, age: P14

B mouse: P23H-RFP/+, age: P30

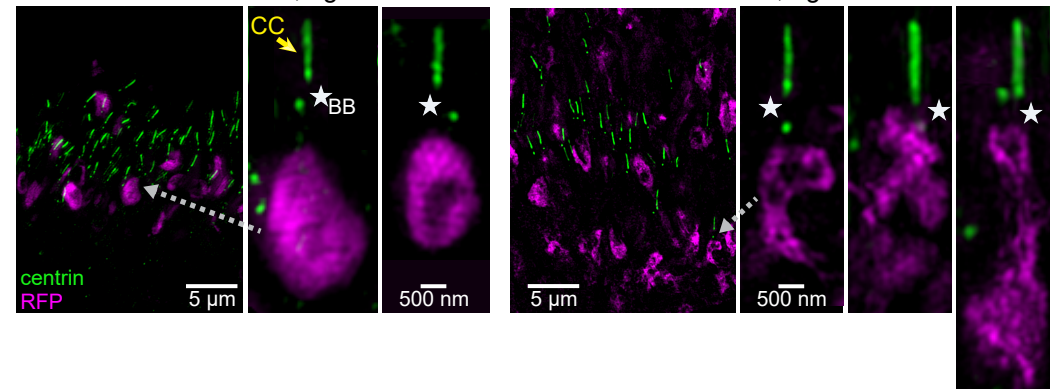

**Figure 4. Mutant P23H-hRho-RFP inner segment aggregates are localized near the basal body in rod neurons.** (A) In a SIM z-projection image of a retinal section from the P23H-RFP/+ mouse at age P14, centrin immunolabeling (green) marks the location of rod connecting cilium (CC) and basal body (BB) relative to the P23HhRhoRFP fluorescent aggregates (magenta). In magnified views, single RFP+ inner segment aggregates are located just proximal to the CC (yellow arrow) and BB (white stars). The BB region is demarcated by the centrin+ mother centriole at the proximal end of the CC and the daughter centriole, which is a separated centrin+ puncta beneath the mother centriole. (B) A SIM image of a retinal section from the P23H-RFP/+ mouse at age P30 also with centrin immunolabeling. In magnified views, the RFP+ aggregates at P30 are still generally located proximal to the BB (white stars), with some examples of RFP overlapping with the BB region. The organization of the RFP+ aggregates in these P30 rods are less compact and more reticulated compared to the examples from age P14 (see examples in A).

202 trafficking stage just prior to the BB and integration into the cilia, and thus it fails to be properly  
203 transported to the OS.

204

205 P23H-RFP/+ mice have mild and gradual retinal degeneration.

206 Next, we tested the effect of the mutant P23HhRhoRFP fusion on retinal health by  
207 measuring the rates of retinal degeneration in both P23H-RFP/+ heterozygous and P23H-  
208 RFP/P23H-RFP homozygous mice. We measured the thickness of the ONL, in which the  
209 photoreceptor nuclei were stained for 4',6-diamidino-2-phenylindole (DAPI) fluorescence, in  
210 retinal sections from both genotypes and in wild-type (+/+) control retinas from mice at multiple  
211 timepoints. Overall, the P23H-RFP/+ heterozygous retinas degenerated more slowly over time  
212 compared to the homozygous retinas as measured by ONL thickness (Fig 5A-B). Our analysis  
213 covered the full retina – peripheral to central – to test for any region-specific degeneration  
214 caused by the mutant P23HhRhoRFP fusion protein.

215 At postnatal day 14 (P14) there is no difference in the ONL thickness in the retinas  
216 among any of the phenotypes, indicating that the retinas develop normally in the P23H-RFP  
217 heterozygous and homozygous mutants (Fig 5A-E). Thereafter, the width of the ONL in the  
218 heterozygous retinas declined slowly, approaching a final value of 23  $\mu\text{m}$  with a time constant of  
219 56 days, while the ONL in the homozygous mutants declined much more rapidly, with a time  
220 constant of 12 days. By age P90 the ONL in P23H-RFP/P23H-RFP homozygous retinas was  
221 reduced to a single, disorganized layer of nuclei (See Fig 5A, 5E, & Fig 5G).

222 Although the ONL thickness in P23H-RFP/+ heterozygous retinas were significantly  
223 reduced in the inferior retina at P60 and P90 (Fig 5B & 5G), the thickness across all regions of  
224 the retina in P23H-RFP/+ mutants was not significantly different from that of +/+ retinas at age  
225 P90 (Fig 5G). Notably, compared to P14 P23H-RFP/+ measurements, the P90 P23H-RFP/+  
226 ONL thickness was significantly reduced (Fig 5D). By age P364 it was evident that the ONL had  
227 been severely reduced in P23H-RFP heterozygous retinas due to nuclei loss (Fig 5B, see

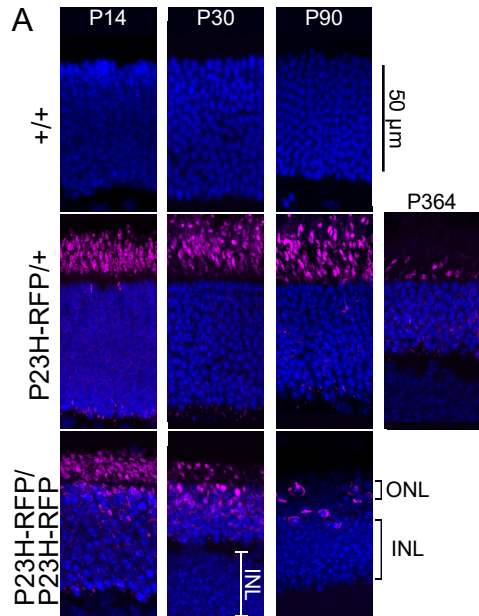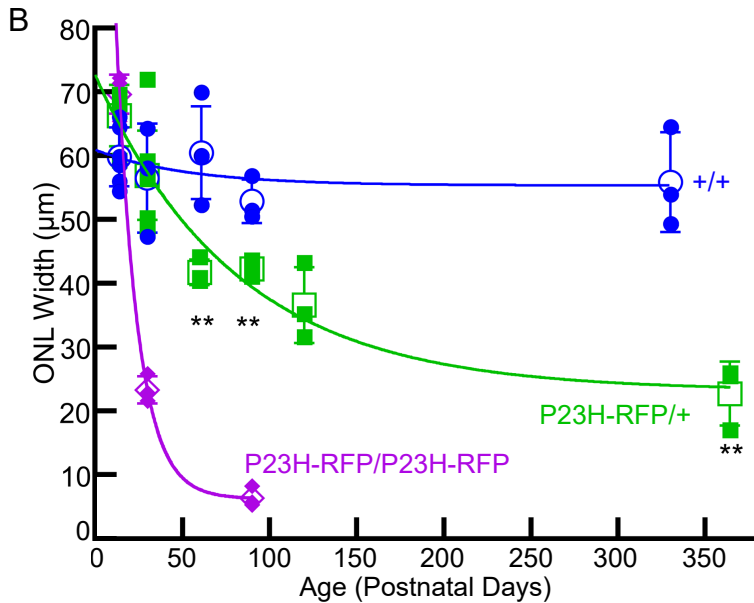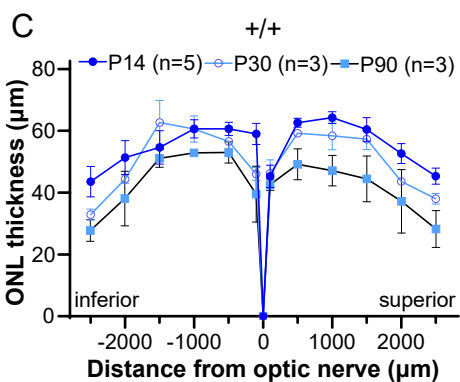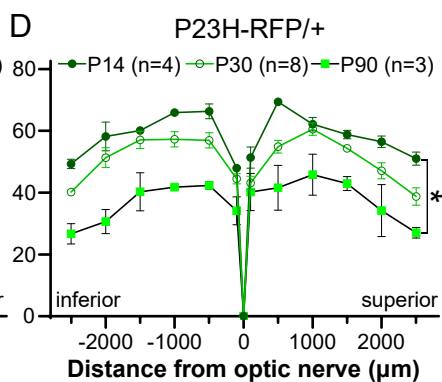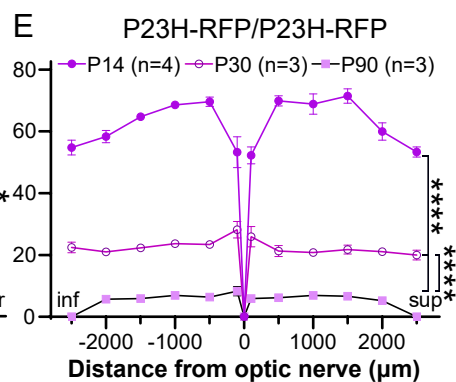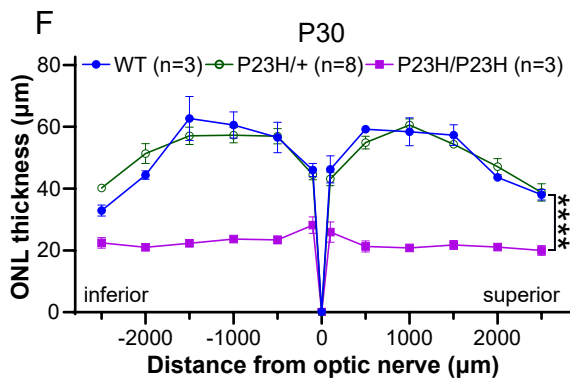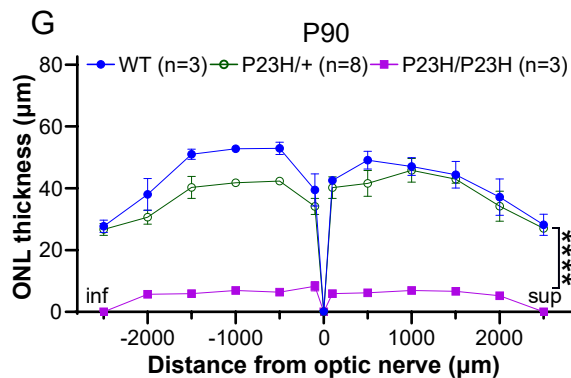

**Figure 5. Time course of retinal degeneration in P23H-RFP/+ heterozygous and P23H-RFP/+ homozygous mice.** (A) Confocal z-projection images of retinal cryosections from wild-type (+/+), and P23H-RFP heterozygote (het) and P23H-RFP/P23H-RFP homozygous (homo) mice at various time points. DAPI (blue) labels photoreceptor nuclei in the outer nuclear layer (ONL) and the bipolar cell nuclei in the inner nuclear layer (INL). RFP fluorescence (magenta) is primarily located in the inner segment layers of het retinas at all time points, while RFP is also located in the ONL in homo retinas. At P90, the homo ONL is reduced to very few disorganized nuclei surrounded by RFP. (B) Time course plot of ONL thickness between genotypes. Measurements correspond to the ONL thickness of the retina 500  $\mu\text{m}$  inferior to the optic nerve. Unfilled shapes correspond to the mean value, and error bars signify standard error of the mean. Solid lines represent fits to exponential decays to plateau, as described in Methods. Unpaired t-tests were calculated to compare +/+ and het values for significance. Comparisons with significant differences are: P61 +/+ vs P60 het (\*\* $p=0.0081$ ), P90 +/+ vs P90 het (\*\* $p=0.0072$ ), and P330 +/+ vs P364 het (\*\* $p=0.0035$ ). (C) “Spider” plots of ONL thickness for 13 positions in +/+ retinal cryosections from the P14, P30 and P90 time points, spanning positions from the optic nerve to the inferior and superior retina. Positions directly adjacent to the optic nerve position (“0”) correspond to 100  $\mu\text{m}$  superior and inferior to the optic nerve. The most peripheral positions of each plot correspond to 100  $\mu\text{m}$  from the superior and inferior ends of the retina. For each position on the plots, circles correspond to mean values and error bars signify standard error of the mean. (D) Corresponding spider plots for P14, P30, and P90 P23H-RFP/+ het retinal cryosections. Tests for statistical differences between plots from different time points were performed using Two-way ANOVA with Šídák multiple comparisons test. The only test with significance is P14 het vs P90 het (\* $P=0.0215$ ). (E) Spider plots for P23H-RFP homozygous retinal cryosections at the same time points. Two-way ANOVA with Šídák multiple comparison tests produced significant differences between all time points: P14 vs P30, P14 vs 90, and P30 vs P90 (all \*\*\*\* $P<0.0001$ ). (F) Spider plots for all retinal cryosections at timepoint P30 to compare differences between genotypes. Two-way ANOVA with Šídák multiple comparison tests produced significant differences at P30 between: +/+ vs homo and het vs homo.(both \*\*\*\* $P<0.0001$ ). (G) Spider plots for timepoint P90 to compare genotypes. Two-way ANOVA with Šídák multiple comparison tests produced significant differences at P90 between: +/+ vs homo. and het vs homo. (both \*\*\*\* $P<0.0001$ ).



230 example in Fig 5A); the ONL width at 364 days in the heterozygotes was 40% of that in WT at  
231 360 days.

232

233 ERG rod photoreceptor function was moderately diminished in P23H-RFP/+ mice.

234 We next used electroretinogram (ERG) recordings to test and correlate retina visual  
235 function to the mild and severe retinal degeneration phenotypes in P23H-RFP/+ mice and  
236 P23H-RFP/P23H-RFP mice, respectively. We found generally that ERG waveforms at age P30  
237 correlated to our retinal degeneration phenotypes between the mutant P23H-RFP genotypes  
238 compared to +/+ control mice (Fig 6A). In dark-adapted conditions, the scotopic a-wave  
239 amplitudes in P23H-RFP/+ mice were significantly reduced compared to +/+ mice at P30 (Fig  
240 6B); however, the a-waves stabilized over time and were not further diminished in P23H-RFP/+  
241 mutants at age P90 compared to P30 (Fig 6C). Scotopic b-wave values were not significantly  
242 reduced in P30 P23H-RFP/+ mice compared to +/+ (Fig 6D), and like the a-wave, the b-wave  
243 values were not diminished in age P90 P23H/+ mice compared to P30 (Fig 6E). We also  
244 measured the implicit times from scotopic ERG recordings, which are times from the a-wave  
245 deflection to peak b-wave. In P30 P23H-RFP/+ mice compared to +/+ mice, implicit times were  
246 higher at moderate flash intensities, but there was not a significant difference over the entire  
247 flash range (Fig 6F).

248 P23H-RFP/P23H-RFP homozygous mice have essentially no scotopic ERG response  
249 (Fig 6A-B and 6D). The minor b-wave response at high flash intensities in homozygotes could  
250 be attributed to cones. We also measured the cone ERG response in light-adapted mice from all  
251 genotypes at P30. Photopic b-wave amplitudes were recorded in both P23H-RFP/+ and P23H-  
252 RFP/P23H-RFP mice, and although they appeared slightly lower in amplitude, they were not  
253 significantly reduced compared to +/+ mice (Fig 6G).

254 To determine whether there were any visible alterations of cone morphology in the  
255 mutants, we used cone arrestin immunofluorescence labeling in our P23H-RFP mice at P30.

256 Cones populated the retinas of P23H-RFP/+ heterozygotes as well as in the retinas of P23H-  
257 RFP/P23H-RFP homozygotes despite the massive loss of photoreceptor nuclei in the  
258 homozygotes (Fig 7A). At P90 we still observed cones in P23H-RFP/+ heterozygotes, but in  
259 P90 homozygotes there were no visible cones remaining, presumably as a result of the nearly  
260 complete loss of rods (Fig 7B).

261 To determine the rate of cell death in our P23H-RFP mice, we used terminal  
262 deoxynucleotidyl transferase dUTP nick end labeling (TUNEL) fluorescence. We observed  
263 TUNEL+ photoreceptor nuclei in the ONL of retinal sections from both P23H-RFP/+ and P23H-  
264 RFP/P23H-RFP mice (Fig 7C). We measured the number of TUNEL+ nuclei per mm<sup>2</sup> area of  
265 the ONL at multiple timepoints. At P14, the number of TUNEL+ nuclei in P23H-RFP/+  
266 heterozygous retinal sections were comparable to +/+ sections, while the rate was significantly  
267 greater in homozygous retinal sections at P14 (Fig 7D). By age P30, the number of TUNEL+  
268 nuclei was significantly greater in P23H-RFP/+ retina compared to +/+ (Fig 7D); however, at age  
269 P90 the TUNEL+ density in heterozygotes was no longer significantly different from that in +/+  
270 mice (Fig 7D).

271 Overall, we observed that P23H-RFP/+ heterozygous mice have a slow and partial  
272 retinal degeneration and mild loss of rod ERG function. At age P90 the heterozygous retinas  
273 were still comparable in overall health to control +/+ retinas despite the gross mis-accumulation  
274 of P23HhRhoRFP protein in the rod inner segments. The rate of photoreceptor cell death in  
275 P23H-RFP/+ retinas indicates that a moderate burst of degeneration begins after P14, which  
276 has slowed by age P90. By comparison, the retinal degeneration and ERG phenotypes in  
277 homozygous P23H-RFP/P23H-RFP mice were much more severe, such that at P90, nearly all  
278 photoreceptor neurons were lost in the retinas of homozygotes.

279

280

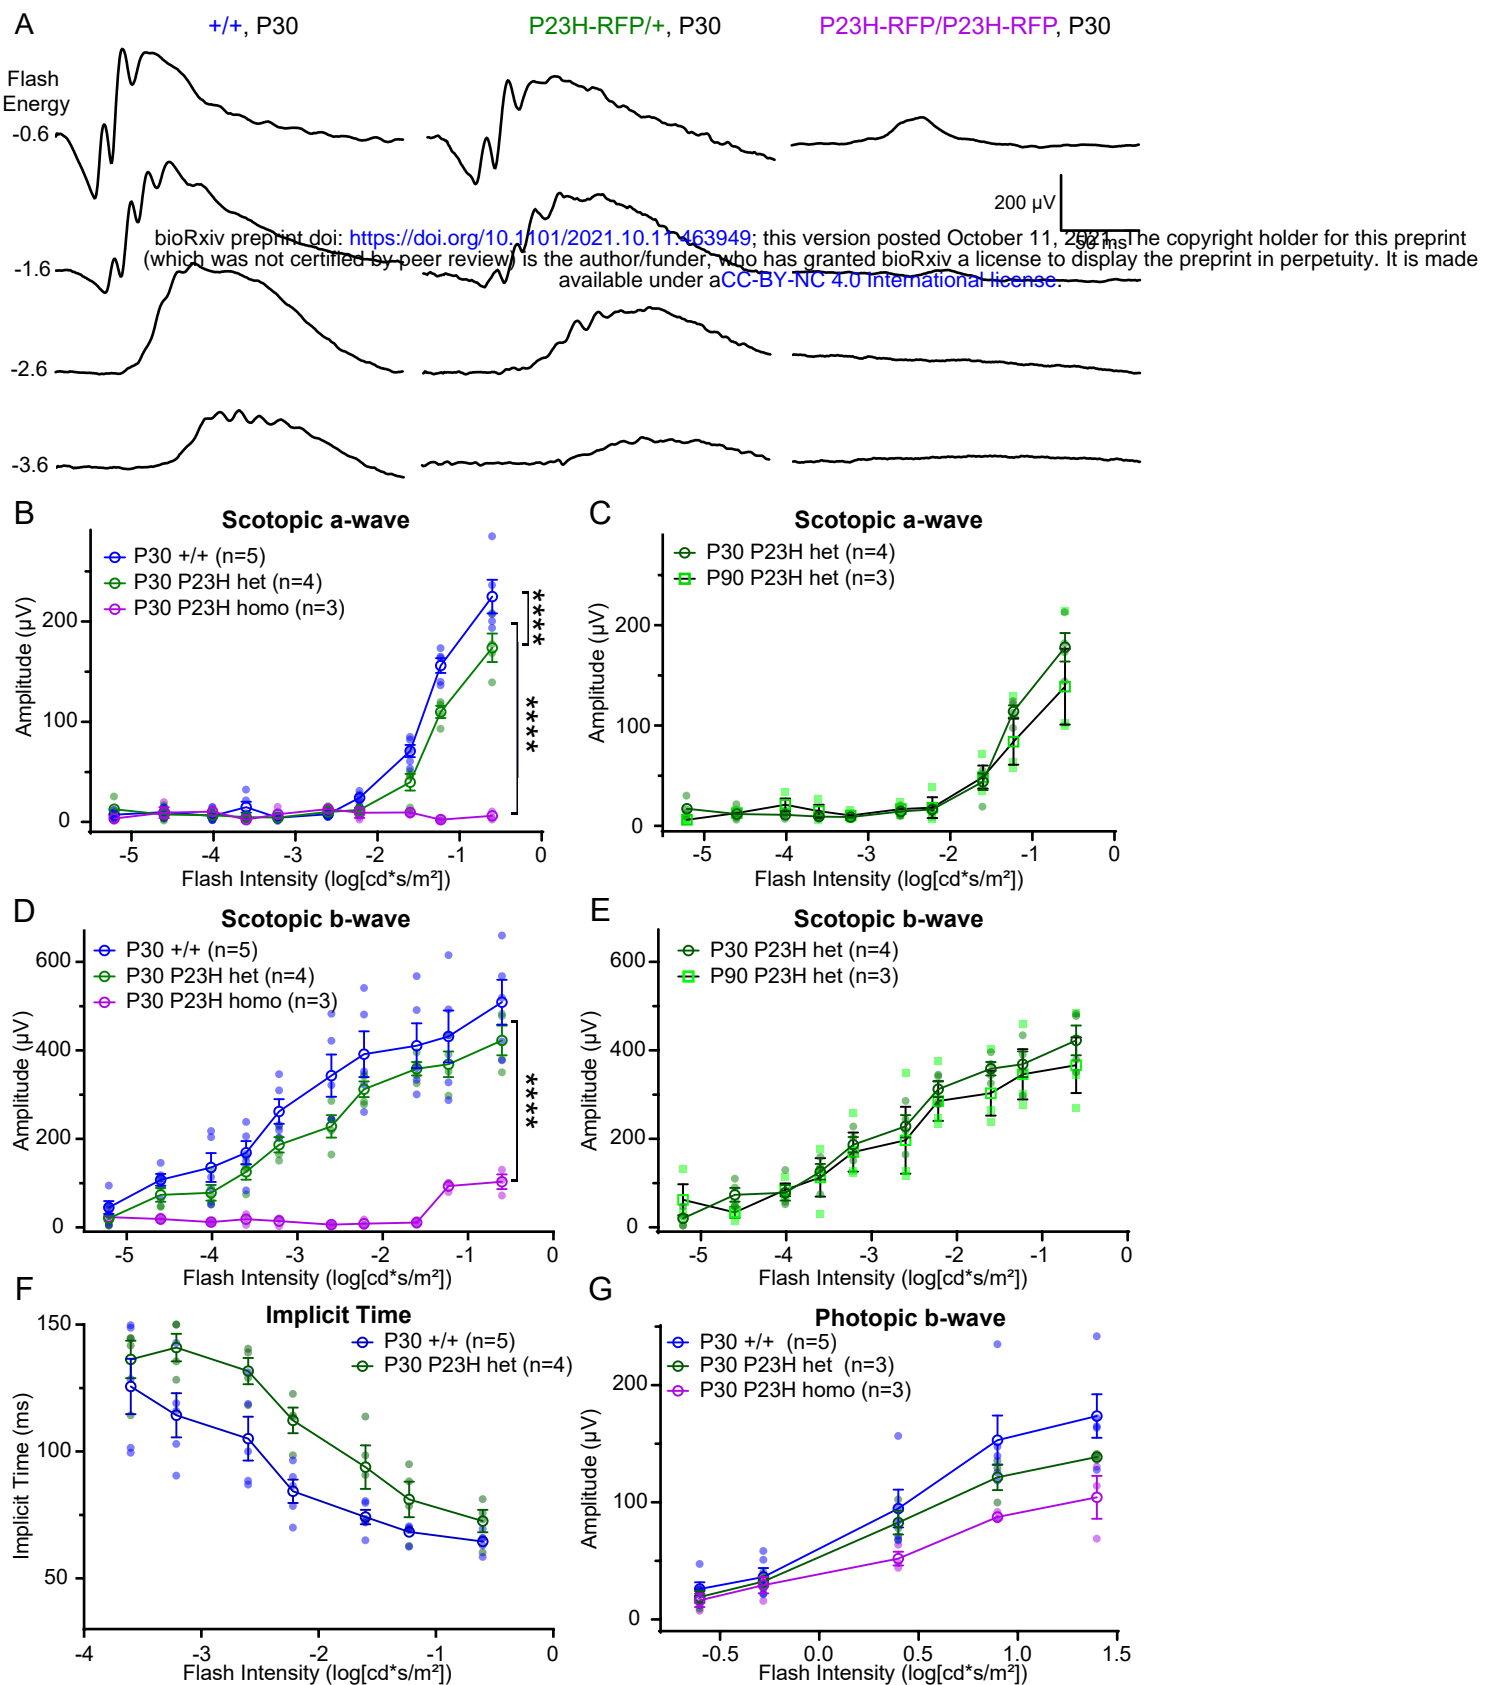

**Figure 6. P23H-RFP/+ heterozygous mice have slightly reduced rod photoreceptor electroretinogram (ERG) responses.** (A) Example ERG recordings from +/+ wild-type, P23H-RFP/+ heterozygous (het) and P23H-RFP/P23H-RFP homozygous (homo) mice at age P30. (B) Aggregate of P30 scotopic a-wave amplitudes. In all plots, solid shapes are data points, empty shapes signify mean values, and error bars signify standard error of the mean. Statistical comparison tests of all the ERG data were performed using Two-way ANOVA with Šídák multiple comparisons tests. All statistical comparisons of P30 a-wave amplitudes were significant: +/+ vs het (\*\*\*\* $P < 0.0001$ ), +/+ vs homo (\*\*\*\* $P < 0.0001$ ), and het vs homo (\*\*\*\* $P < 0.0001$ ). (C) Scotopic a-wave amplitudes between P30 and P90 P23H/+ het mice were not statistically different ( $P = 0.27$ ). (D) Aggregate of P30 scotopic b-wave amplitudes. Statistically significant differences were calculated for +/+ vs homo (\*\*\*\* $P < 0.0001$ ) and het vs homo (\*\*\*\* $P < 0.0001$ ). WT vs het was not statistically different ( $P = 0.9744$ ) (E) Scotopic b-wave amplitudes between P30 and P90 P23H/+ het mice were not statistically different ( $P = 0.9375$ ). (F) Aggregate implicit times, the time to peak scotopic b-wave post a-wave, in P30 +/+ and het mice. P30 het mice had higher implicit times than +/+ at intermediate flash stages, but the difference over the entire flash range was not statistically significant ( $P = 0.5651$ ). (G) Aggregate of P30 photopic b-wave amplitudes. There were no statistically significant differences among the genotypes: +/+ vs het ( $P = 0.749$ ), +/+ vs homo ( $P = 0.1298$ ), het vs homo ( $P = 0.1553$ ).



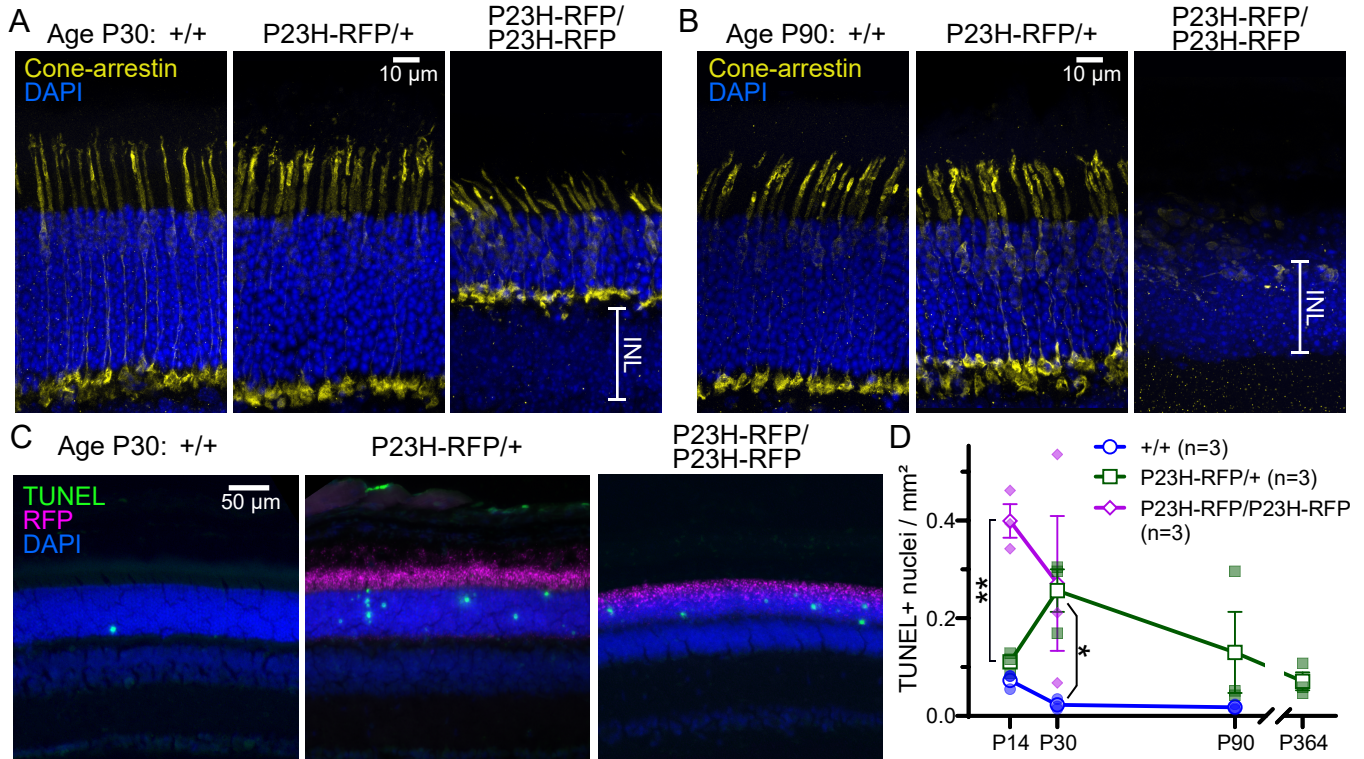

**Figure 7. Cone immunolocalization and TUNEL analysis of photoreceptor cell death in P23H-hRho-RFP retinas.** (A, B) Examples of cone arrestin immunofluorescence staining (yellow) in retinal sections from ages P30 (A) and P90 (B), among +/+, P23H-RFP/+, and P23H-RFP/P23H-RFP mice. DAPI staining (blue) labels both photoreceptor nuclei in the outer nuclear layer (ONL) and in the inner nuclear layer (INL). (C) TUNEL fluorescence analysis of photoreceptor cell in retinal cryosections. Shown are examples of age P30 retinal sections from +/+, P23H-RFP/+ heterozygous (het), and P23H-RFP/P23H-RFP homozygous (homo) mice with TUNEL+ nuclei (green) within the DAPI stained nuclei of the ONL (blue). RFP fluorescence is magenta. (D) Time course plot of aggregate TUNEL+ nuclei/mm<sup>2</sup> measurements among all genotypes at multiple time points. Statistical comparisons among groups were performed using unpaired t-tests. At P14, homo retinas have statistically more TUNEL+ nuclei compared to both +/+ (\*P=0.0167) and het (\*\*P=0.0098) retinas. At P30, het retinas have statistically more TUNEL+ nuclei compared to +/+ retinas (\*P=0.042), but the rate of TUNEL+ nuclei between het and +/+ retinas is not statistically different at age P90 (P=0.312).

285 Quantification of select mRNA levels from P23H-RFP/+ mouse retinas by Q-RTPCR.

286 As ER stress and the Unfolded Protein Response (UPR) have been proposed to be  
287 important in neurodegeneration due to misfolded proteins in photoreceptors (47-51), we  
288 examined mRNA levels for several markers of these pathways, using two different  
289 “housekeeping” genes for normalization, *RPL19* and *HPRT*. Genes whose messages we  
290 quantified included those encoding BiP, CHOP, ATF6, Eif2 $\alpha$ , PERK, DRL1 and XBP1. None  
291 showed a statistically significant increase relative to both “housekeeping” genes (Fig. 8). We  
292 also quantified levels of mRNA transcribed from the *Rhodopsin* locus, using primer pairs that  
293 either amplified both human and mouse alleles (mhRho), or the mouse allele only (mRho). Both  
294 showed a decrease in message levels in the retinas of heterozygotes relative to those in the  
295 WT. The mouse-specific message would be expected to be reduced by ~50%, based strictly on  
296 copy number; however, the reduction was about 70%, whereas the total message derived from  
297 both alleles was down about 35% suggesting a down-regulation of both *Rho* mRNAs by 35%  
298 relative to WT through either reduced transcription or increased degradation, possibly in  
299 response to the presence of aggregated protein.

300

301 P23HhRhoRFP protein was mis-accumulated in the inner segment endoplasmic reticulum.

302 To understand how the mutant P23HhRhoRFP protein is handled by the P23H-RFP/+  
303 rods, we examined the subcellular structures by transmission electron microscopy (TEM) of  
304 ultra-thin retina sections following a tannic acid based staining procedure that densely stains  
305 internal membranes (8). At age P14, in P23H-RFP/+ heterozygous rods, we observed distinct  
306 membranous accumulations in the IS that matched the shape and morphology of the  
307 fluorescent RFP+ aggregates (Fig. 9A-B). Compared to +/+ rods, where cytoplasmic  
308 membranes are mostly observed in the proximal IS, the membranous accumulations in  
309 heterozygous rods were primarily in the form of semi-organized stacks of folded membranes in

310 the distal IS. These membranes often filled the mutant IS cytoplasm, apparently distending the  
311 width of the IS itself. Indeed, we measured the average maximum IS width of P14 P23H-RFP/+  
312 rods to be significantly greater compared to the WT average maximum width (Fig 9, see  
313 legend). Despite these large aberrant IS membranes in P23H-RFP/+ rods, the morphologies of  
314 the BB, CC and OS discs were relatively normal and indistinguishable between P23H-RFP/+  
315

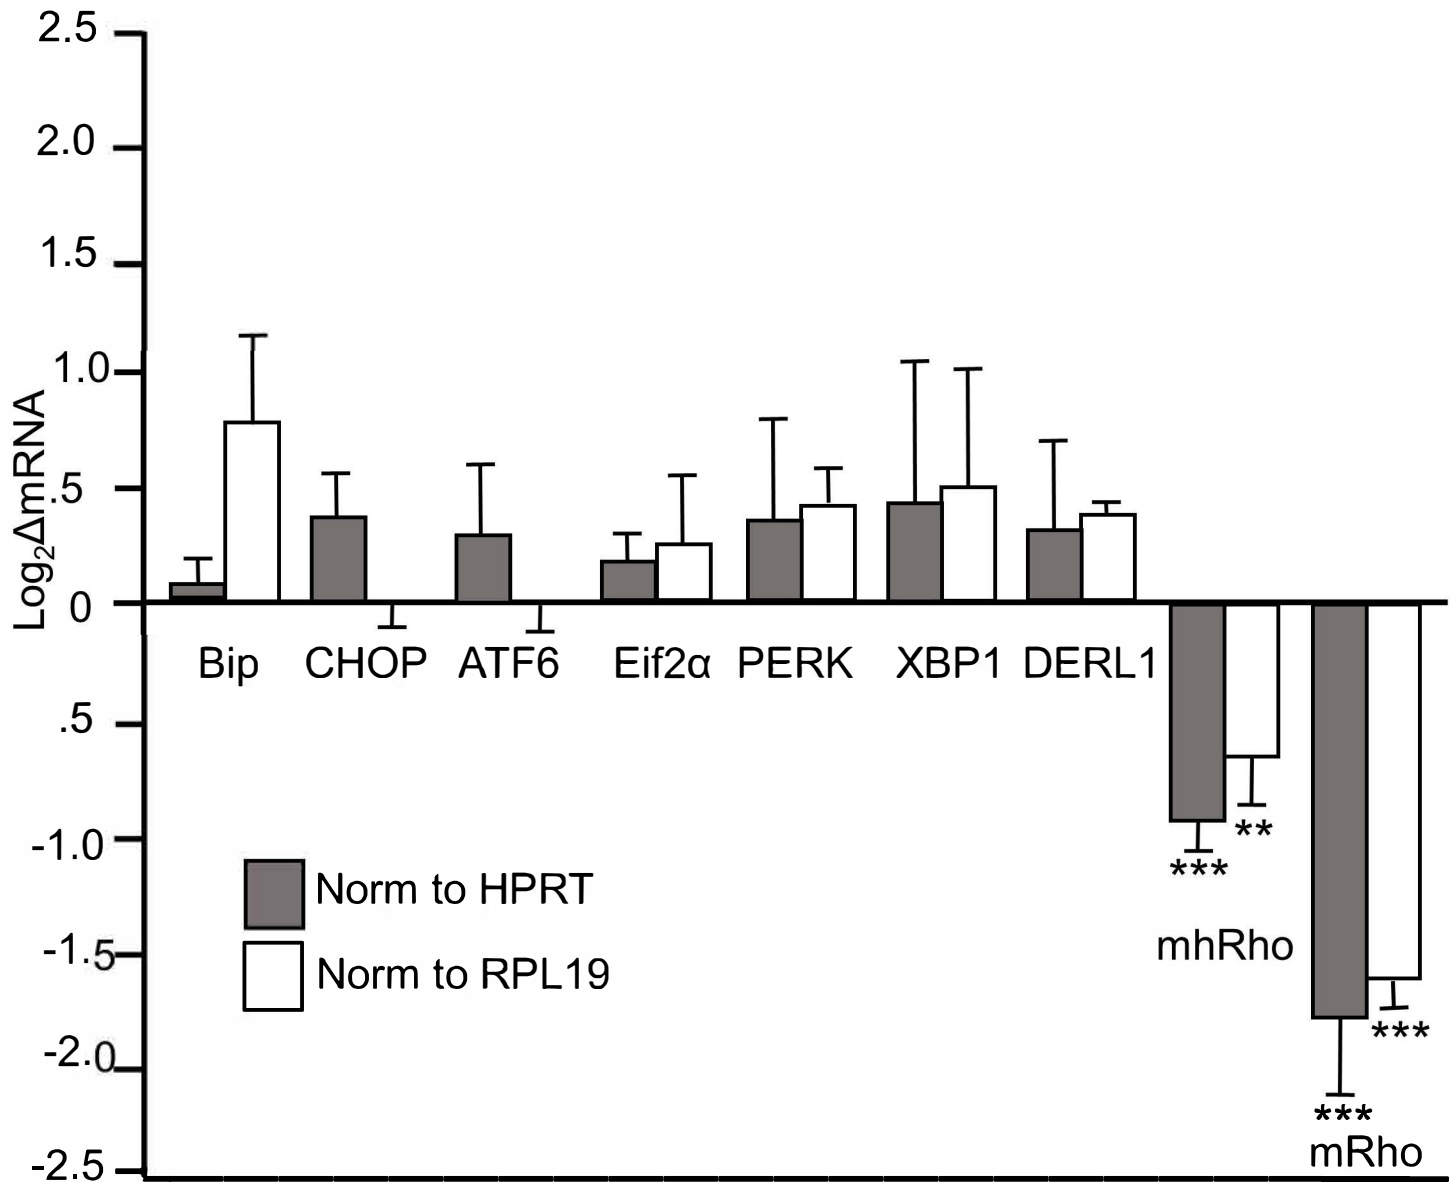

**Figure 8. mRNA levels of ER stress and Unfolded Protein Response markers are near normal in P23H-RFP/+ heterozygous retinas at postnatal day 30.** Results of Q-RT-PCR measurements of the indicated messages in RNA extracted from retinas of heterozygotes as compared to wild-type (+/+) (n=3 for both), normalized to HPRT (dark grey bars) or RPL19 (open bars). Statistical comparisons were made with two-tailed t-tests.: mhRho vs. RPL19 \*\*P = 0.0099; mhRho vs. HPRT \*\*\*P=0.000741.; mRho vs. RPL19 \*\*\*P=0.000585. mRho vs. HPRT \*\*\*P=0.000542.

318 and WT rods at P14, except for the length of the CC, which was significantly longer in mutant  
319 rods (Fig 9A-B, see legend).

320 We also used TEM to examine the morphology of the RFP+ IS aggregates in P23H-  
321 RFP/+ rods at P30, where the RFP granule fluorescence appeared less organized than in P14  
322 rods (Fig 4A-B). With TEM, in age P30 P23H-RFP/+ rods, we also observed accumulated IS  
323 membranes; however, they did indeed appear more dysmorphic than those at P14, with  
324 examples of the membranes wrapping around themselves in whorls (Fig 9C, magenta arrows).  
325 As in P14 P23H-RFP/+ retinal sections, the aberrant rod IS membranes at P30 were located  
326 among normally formed OS disc stacks, and the CC and BB structures were also  
327 morphologically normal at P30 (Fig 9D). Unlike P14 rods, however, we observed some defects  
328 in OS membrane morphology at the base of the OS in some P30 P23H-RFP/+ rods. These  
329 defects included vesicular and misshapen discs, and an unbound, splayed OS axoneme (Fig  
330 9C-D, green arrows). The results indicate that the mutant P23H-Rho-RFP leads to massive  
331 alterations of inner segment membrane structure, accompanied by a least partial disruption of  
332 outer segment morphology.

333 To determine the nature of the membranes in which the RFP fusion protein is located,  
334 we used immunofluorescence with antibodies for the endoplasmic reticulum (ER) antigens  
335 BiP/GRP78 (binding immunoglobulin protein/glucose-regulated protein 78, an ER lumen  
336 chaperone protein) and KDEL (an ER-specific tetrapeptide folding tag), and for the Golgi  
337 antigen GM130 (a Golgi-specific membrane marker). In confocal z-projections, we found that  
338 BiP ER immunolabeling was co-localized with the RFP+ IS aggregates in rod cells from P14  
339 P23H-RFP/+ retinal sections (Fig 10A). Compared to +/+ BiP labeling, which was largely  
340 located in the proximal IS, BiP staining in the mutant P23H-RFP/+ retina was extended into the  
341 distal IS and colocalized with the RFP+ aggregates. This result demonstrates that the  
342 membrane stacks we observed in the IS of mutant rod via TEM are greatly expanded ER  
343 membranes. The Golgi



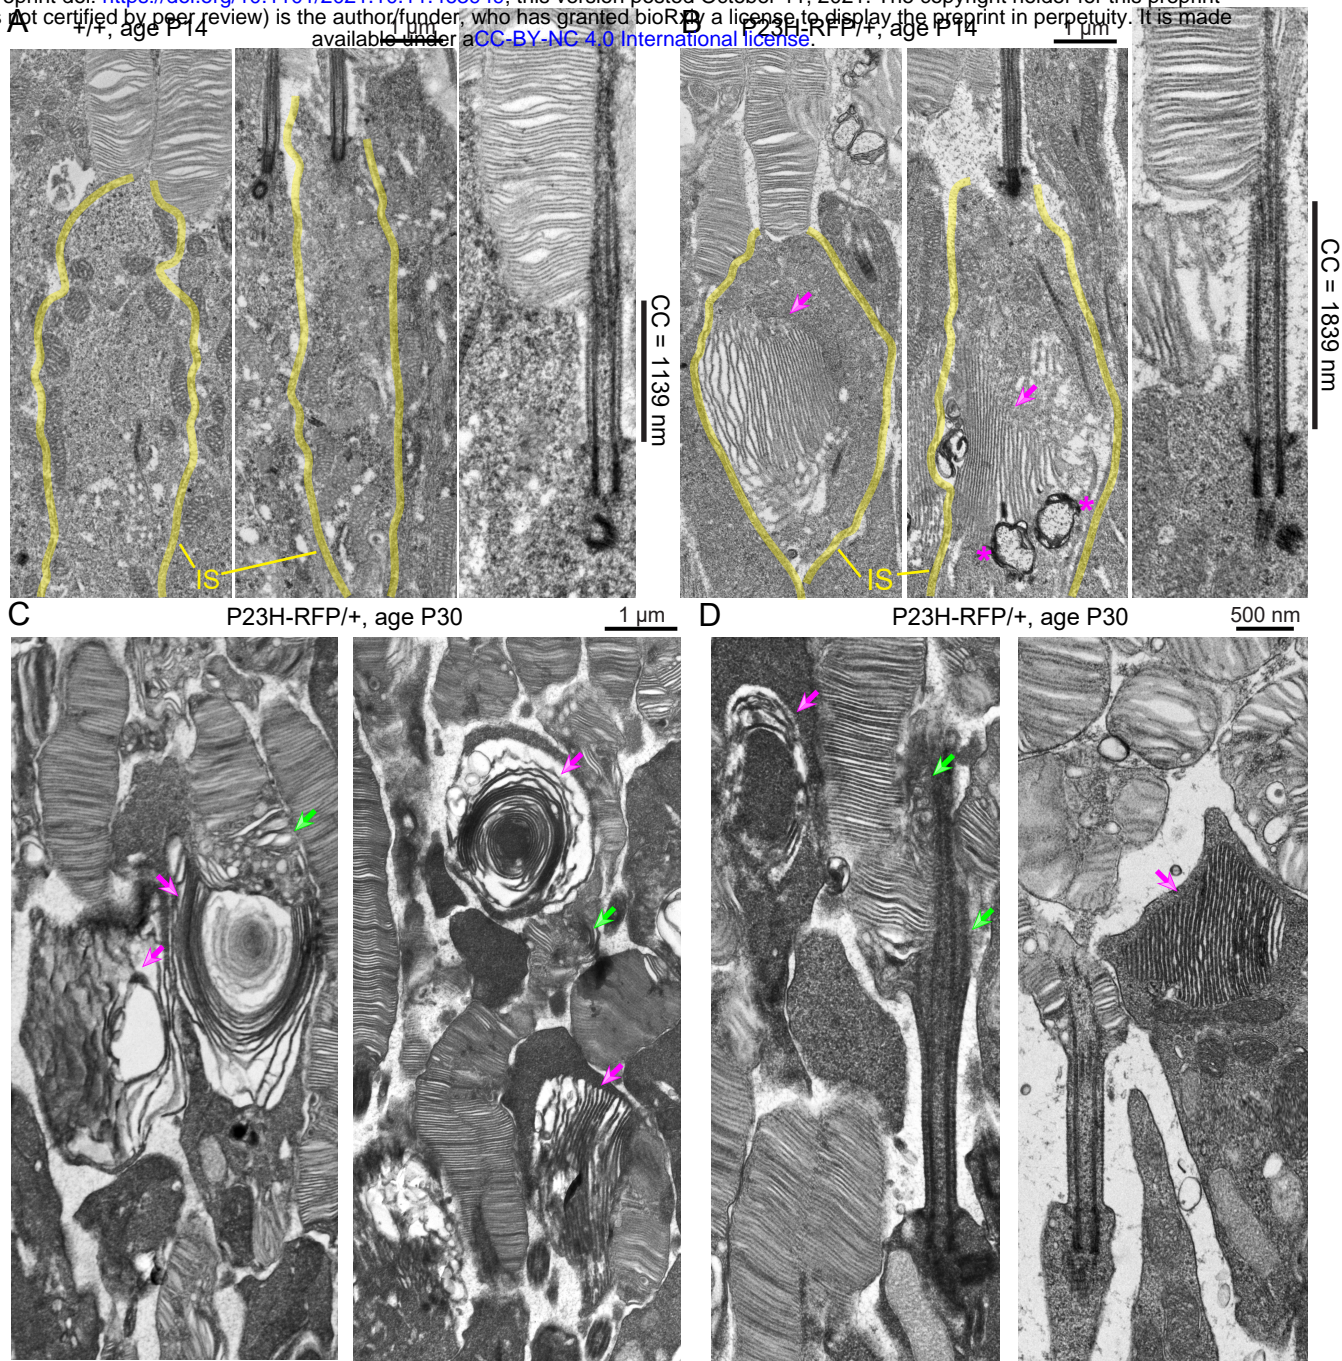

**Figure 9. P23H-Rho-RFP/+ mutant rod photoreceptor neurons have distended inner segments filled with ectopic membranes.** (A-B) Conventional transmission electron microscopy (TEM) images of rod photoreceptor neurons at age P14 from either (A) +/+ or (B) P23H-RFP/+ heterozygous (het) mice. In each example rod, the inner segment (IS) is outlined with yellow lines. The IS max width in P14 P23H-RFP/+ rods is significantly greater than +/+ rods (het:  $2.967 \mu\text{m} \pm 0.508 \mu\text{m}$  (standard deviation, sd) (n=14) vs +/+ :  $1.974 \pm 0.481 \mu\text{m}$  (sd) (n=19),  $P < 0.0001$ , unpaired t-test). Ectopic stacks of IS membranes in the swollen P23H-RFP/+ IS are marked with magenta arrows. Double-membraned autophagy compartments are marked with magenta asterisks in the mutant P23H-RFP/+ IS. In magnified views of example connecting cilia (CC) from each genotype, the length of the CC – measured by the densely stained CC membrane – is indicated. In aggregate, the length of the CC in P23H-RFP/+ rods is significantly greater than +/+ CC (het:  $1.548 \mu\text{m} \pm 0.206 \mu\text{m}$  (sd) (n=13) vs +/+ :  $1.27 \mu\text{m} \pm 0.247 \mu\text{m}$  (sd) (n=11),  $P = 0.0066$ , unpaired t-test). (C) At age P30, the ectopic IS membranes in P23H/+ rods appear more dysmorphic compared to P14 (magenta arrows). In addition, some outer segments disc membranes within or adjacent to P23H-RFP/+ rods with IS defects are also disrupted and appear dysmorphic (green arrows). (D) In examples of the CC and basal OS regions of P30 P23H/+ rods, the structure of the CC and basal body remain intact despite being adjacent to ectopic IS membranes (magenta arrows); however, there is evidence that basal OS disc morphogenesis is disrupted possibly due to OS axoneme instability (green arrows).

348 network was unaffected in P14 P23H-RFP/+ retinas and was not co-localized with RFP+  
349 aggregates (Fig 10B).

350 We used SIM superresolution microscopy to examine the morphology of the ER and  
351 Golgi more closely in individual rods in P23H-RFP/+ heterozygous and +/+ retinas at P30. We  
352 added centrin immunolabeling to label the CC and BB in these SIM experiments. In P30 P23H-  
353 RFP/+ retinas, we again observed BiP co-localization with RFP aggregates in the IS (Fig 10 B-  
354 C, white arrows). The BiP+ ER lumen surrounded and was intercalated with the mislocalized  
355 P23HhRhoRFP protein that appeared aggregated within the ER membranes. We also observed  
356 BiP+ ER in other regions of the IS including at the BB (Fig 10 B-C, yellow arrows). In control  
357 wild-type (+/+) P30 retinas, the BiP-positive ER is located throughout the IS in a reticulated  
358 morphology that extends to the BB as well (Fig 10E). We observed similar KDEL+ ER  
359 localization in P30 P23H/+ rods: both co-localized within RFP+ aggregates (Fig 10F, white  
360 arrows) and in the BB region (Fig 10F, yellow arrows); however, KDEL labeling was more  
361 punctate than BiP labeling. In P30 +/+ rods, KDEL was also localized throughout the IS and in  
362 the BB region (Fig 10G). Although there is much evidence of co-localization of RFP and ER  
363 marker signal, the ER markers are not uniformly distributed throughout the clumps of RFP  
364 signal, and there are large sections of RFP-positive aggregates without ER marker signal.

365 We also used SIM to examine the morphology of GM130+ Golgi in P30 P23H-RFP/+  
366 rods. As before we observed the Golgi in the proximal IS of P23H-RFP/+ retinas and  
367 segregated from the RFP+ aggregates and the centrin+ CC/BB. In some mutant heterozygous  
368 rod IS, however, we observed smaller GM130+ Golgi membranes within the RFP+ aggregates  
369 (Fig 10H, white arrows). Also, we found some examples of P30 P23H-RFP/+ rods with more  
370 elaborate Golgi that extended into the distal IS and nearby RFP+ aggregates (Fig 10H, yellow  
371 arrows). In SIM images of P30+/+ retina immunolabeled for GM130 and centrin, we found most  
372 of the Golgi in the proximal IS and dissociated from the centrin+ cilium. Interestingly, however,  
373



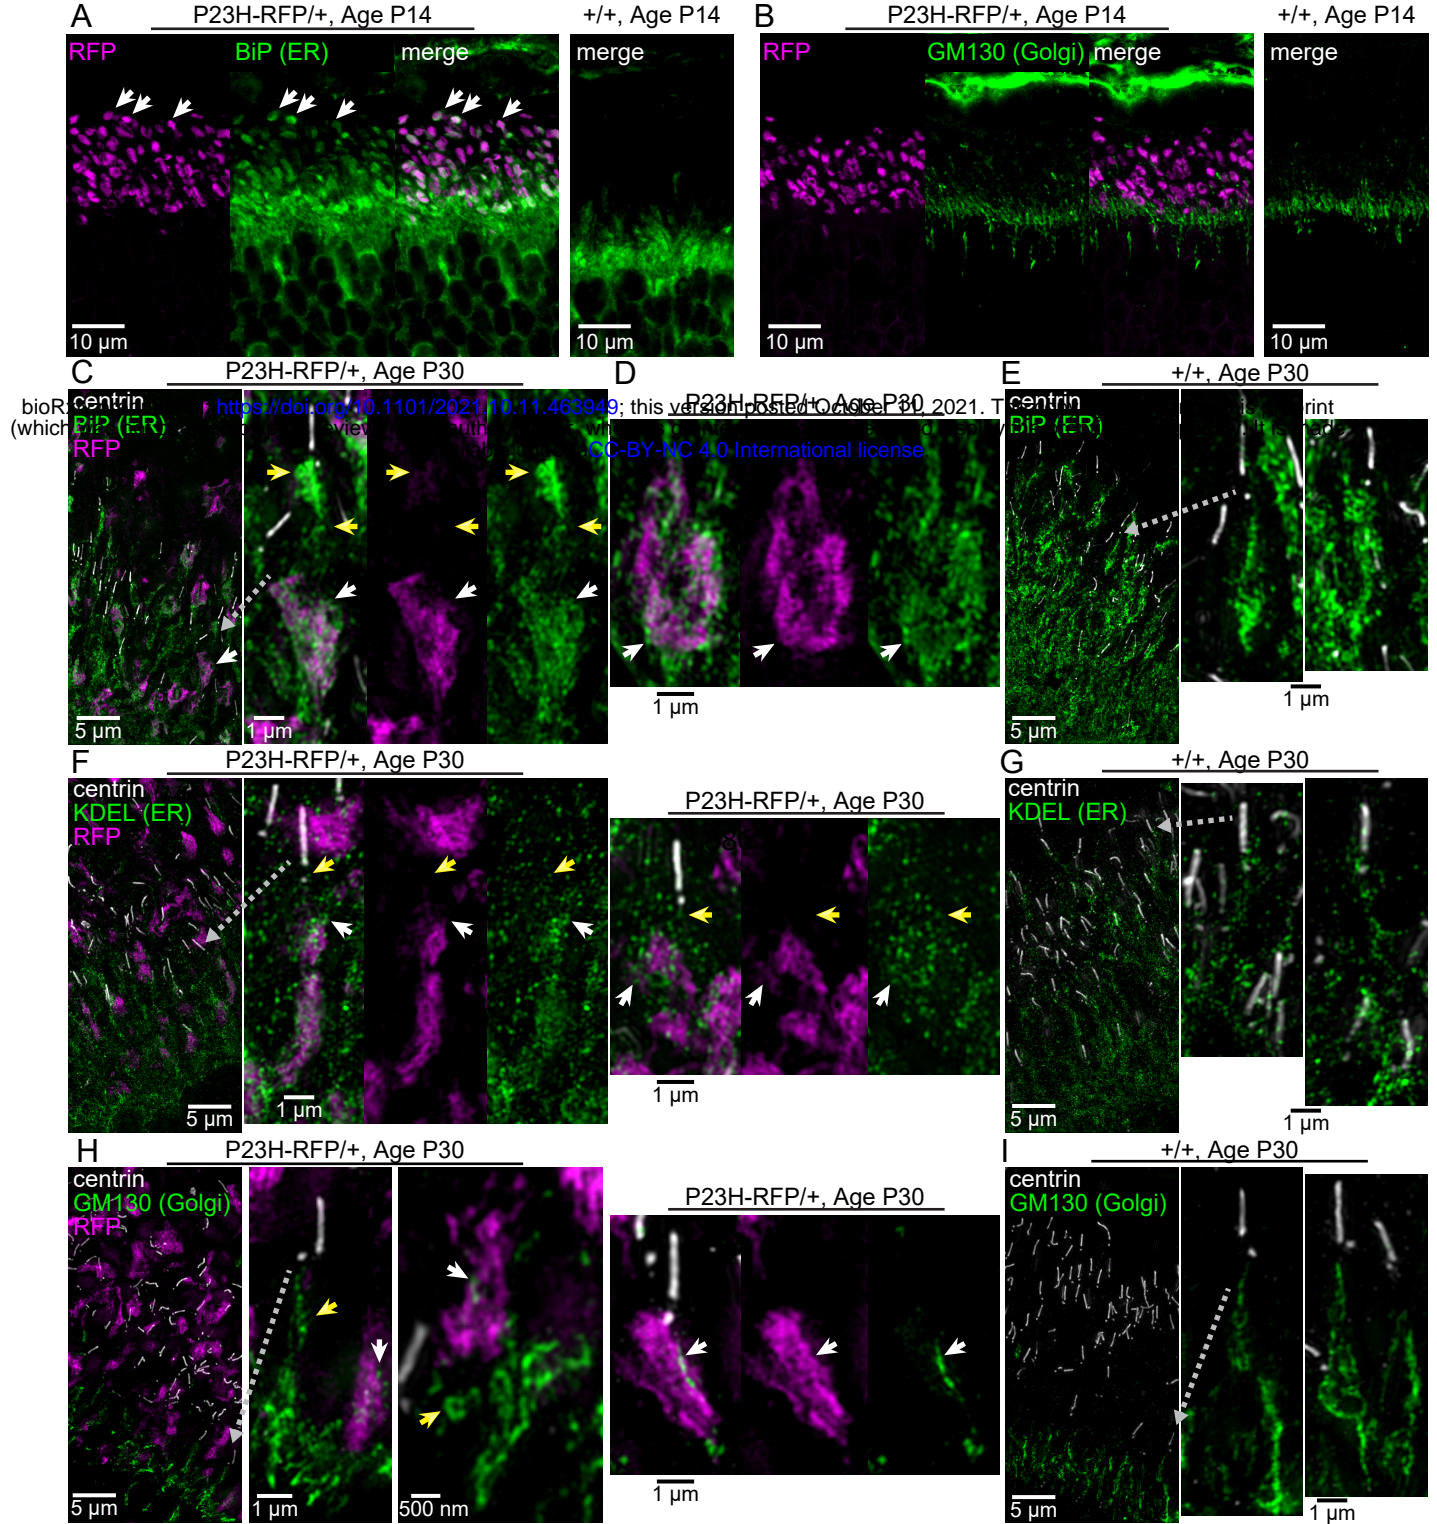

**Figure 10. Mutant P23H-hRho-RFP protein is accumulated within ER membranes in P23H-RFP/+ mouse rods.** (A-B) Confocal z-projection images of a retinal cryosection from P14 P23H-RFP/+ and +/+ littermate mice, immunolabeled for either the ER luminal marker BiP/GRP78 (green) (A) or the Golgi marker GM130 (green) (B). P23HhRhoRFP fluorescence is magenta. Co-localized BiP with RFP+ aggregates in the P14 P23H-RFP/+ retina section is marked with white arrows. GM130+ Golgi membranes do not co-localize with RFP+ aggregates and appear unaffected in the P14 P23H-RFP/+ retina compared to +/+ sections. (C) SIM z-projection images of a retina cryosection from an age P30 P23H-RFP/+ mouse that is immunolabeled for BiP (green) and centrin (white), which labels the connecting cilium (CC) and basal body (BB). RFP fluorescence is magenta. In a magnified inner segment (IS), BiP colocalization with a P23HhRhoRFP aggregate is marked with white arrows. BiP+ ER near the cilium that is not colocalized with RFP is marked with yellow arrows. (D) Within the same SIM images, the BiP+ ER tightly surrounds a P23HhRhoRFP aggregate (white arrows). (E) In age P30 +/+ SIM control images, BiP immunolabeling marks the inner segment ER network that leads to the cilium. (F) SIM z-projections of age P30 P23H-RFP/+ retinal sections immunolabeled for KDEL, another ER lumen marker (green), along with centrin (white) and RFP (magenta). KDEL puncta are more diffuse than BiP, but the localization pattern in the IS is similar; KDEL co-localization with the P23H-RFP aggregates (white arrows) and KDEL+ ER near the basal body that is not associated with RFP (yellow arrows) are labeled. (G) In age P30 +/+ SIM control images, KDEL immunolabeling (green) labels puncta throughout the inner segment. (H) SIM images of a P23H-RFP/+ retina cryosection at age P30 immunolabeled for GM130, a Golgi membrane marker (green), along with centrin (white) and RFP (magenta). Overall, The Golgi is proximally localized to the RFP+ aggregates at P30, but in some examples the Golgi network reaches the centrin+ cilium. On a subcellular scale, the Golgi membranes are generally segregated from RFP aggregates (yellow arrows), but small pieces of Golgi membrane are found co-localized with some RFP aggregates (white arrows). (I) In age P30 +/+ SIM control images of retinal cryosections, the Golgi is predominantly dissociated from the cilia; however, examples of +/+ rods with GM130+ Golgi membrane networks that reach the basal body are shown. Gray dotted arrows throughout mark a region that is magnified from the same image.



377 we did observe some examples of +/+ rods in which the Golgi network was more elaborate and  
378 extended up to the BB (Fig 10I).

379           Finally, in our SIM images we observed both BiP+ and KDEL+ ER localized with the  
380 mislocalized P23HhRhoRFP protein in the region of rod synapses in the OPL (outer plexiform  
381 layer) of P30 P23H-RFP/+ retinas (Fig 11A-B). GM130-positive Golgi was not localized in the  
382 OPL of P30 P23H-RFP/+ retinas (Fig 11C).

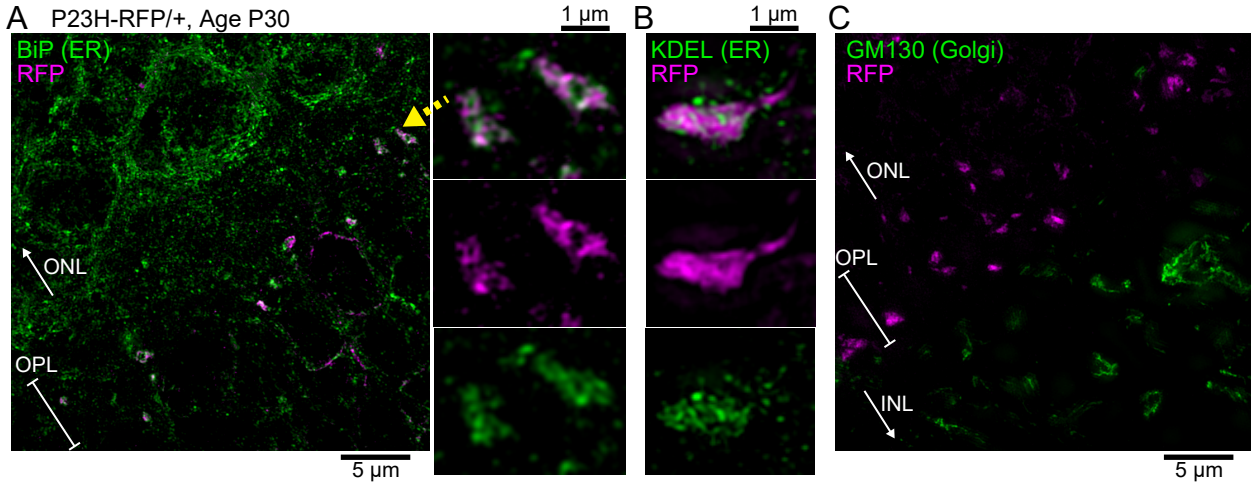

**Figure 11. Localization of P23HhRh-RFP protein with the ER in the outer plexiform layer (OPL) of P23H-RFP/+ retinas.** (A) A SIM z-projection image of a P23H-RFP/+ retinal cryosection, age P30, immunolabeled for BiP/GRP78 to label the ER (green) in the OPL and surrounding area. P23HRhoRFP protein (magenta) fills the rod photoreceptor synapses in this region. BiP+ ER labeling is present throughout the OPL and the outer nuclear layer (ONL). In a magnified view of a pair of synapses, P23HhRhRhoRFP protein is co-localized with the BiP+ ER staining. (B) In a similar SIM magnified view of a P30 P23H-RFP/+ retina section immunostained for KDEL (green), P23HRhoRFP protein is also co-localized with KDEL+ ER staining. (C) As a control SIM image, a P30 P23H-RFP/+ retina section is immunostained for GM130 to label Golgi. No Golgi membranes are evident in the OPL; however, they are present in the inner nuclear layer (INL).

386

## 387 **Discussion**

388           The P23HhRhoRFP mouse we introduce here is a potentially useful animal model for  
389 adRP that can reveal the subcellular and molecular pathology of the misfolding P23H-Rho  
390 mutation on the long-term health of mammalian rod neurons. Tag-RFP-T fluorescence in these  
391 mice enables both gross and nanoscopic analysis of P23H-Rho ER accumulation in vivo. The  
392 WT-hRho-GFP/P23HhRhoRFP dual color heterozygote demonstrates the different ways the cell  
393 processes these two proteins with similar fusions, but with and without the P23H rhodopsin  
394 mutation (Fig 3). WT-Rho-GFP fusion protein is restricted almost exclusively to the OS in rods  
395 of the Rho-GFP heterozygotes (52), whereas the same fusion construct with a P23H mutation  
396 was largely confined to the inner segment and ONL (35), as observed in the new model  
397 reported here, consistent with the notion that the P23H mutation is responsible for the disruption  
398 in normal trafficking, likely as a result of misfolding (18). Furthermore, with superresolution  
399 microscopy, we observed P23HhRhoRFP localization proximal to the connecting cilium and  
400 basal body in P23H-RFP/+ heterozygous rods and completely excluded from the OS (Figs 2-3).  
401 The exclusive IS mislocalization of the P23H-Rho-RFP protein is unlike P23H-Rho localization  
402 in other mouse models, in which there is some detectable OS transport despite other  
403 mislocalization and degradation phenotypes (25, 27, 31, 34).

404           While both P23H-RFP/+ heterozygous and homozygous retinas had mislocalization of  
405 P23H-Rho to the IS, rod neuron degeneration in the homozygotes was more severe. In the  
406 heterozygotes, despite dramatic P23H-Rho mislocalization and a burst of rod cell death around  
407 age P30, the progression of degeneration in P23H-RFP/+ retinas was only partial and relatively  
408 slow. By comparison, in the “untagged” P23H-Rho knockin mouse line, heterozygotes lose 43%  
409 of their rod population relative to WT by P63 (28); we do not observe such a severe reduction  
410 until age P120 (Fig 5B).

411           The stability of the P23H-RFP/+ heterozygous rods over time enables long term studies  
412 in these mice and suggests an adaptation in these rods that provides a neuroprotective effect  
413 despite the ER accumulation of P23H-Rho protein. This effect may be related to an ER stress  
414 adaptation like the unfolded protein response (UPR), which was originally characterized based  
415 on an increase in *BiP/Grp78* and *C/EBO protein (Chop)* mRNA levels - indicators of an  
416 activation of the pancreatic endoplasmic reticulum kinase-like endoplasmic reticulum kinase  
417 (PERK) UPR pathway - in transgenic P23H-Rho rats (53). Also in P23H-Rho transgenic rats,  
418 overexpression of BiP/Grp78 preserved ERG rod function (54), and overexpression of the BiP-  
419 binding ER chaperone ERdj5 preserved photoreceptor survival (55). Although we found no  
420 evidence for up-regulation of BiP CHOP or PERK at the mRNA level at P30 in P23H-RFP/+  
421 retinas (Fig. 8), we did not measure corresponding protein levels, or mRNA levels at later ages.  
422 We did observe widespread BiP/Grp78 protein in the ER throughout the rod cytoplasm, which  
423 co-localized with the ER-accumulated P23H-Rho-RFP protein (Fig. 9).

424           In contrast, in the untagged P23H-Rho knockin mouse, the inositol-requiring enzyme 1  
425 (IRE1) UPR pathway was shown to be activated concurrent with increased ER-associated  
426 protein degradation (ERAD) activity, whereas the PERK pathway was not activated in this  
427 model (56). Another study supported a key role for protein degradation by demonstrating that  
428 P23H-Rho photoreceptors were preserved by genetically over-activating the proteasome by  
429 crossing the untagged P23H-Rho knockin mouse with mice constitutively overexpressing either  
430 the PA28 $\alpha$  or PSMD11 proteasomal cap protein (57). Therefore, the ER membrane expansion  
431 we observed in P23H-RFP/+ rods with TEM (Fig 8) could a be compensatory ER stress  
432 mechanism in response to an overload of ERAD and proteasome degradation. Such an  
433 adaptation warrants further study. In TEM images of P14 P23H-RFP/+ rods, we also observed  
434 double membrane autophagosome-like structures adjacent to the ER (Fig 8A), indicating an  
435 autophagy component to the P23H-RFP pathology. Similar double membrane vesiculations  
436 were observed in transgenic bovine-P23H-Rho *Xenopus* tadpoles that were exposed to light

437 (23), and more recently LC3-positive autophagosomes were localized adjacent to P23H-Rho  
438 protein in the inner segments of these same *Xenopus* rods expressing bovine-P23H-Rho (58).

439 We observed a deterioration in the morphology of the accumulated ER IS membranes in  
440 P23H-RFP/+ rods from age P14 to P30 with both RFP fluorescence (Fig 4) and TEM (Fig 8). In  
441 addition to large IS membrane whorls in the IS at P30 (Fig 8C), the ER membrane structures  
442 were more disorganized than the tight membrane stacks at P14. We also observed ER at the  
443 photoreceptor synapse carrying mislocalized P23HhRhoRFP protein in the OPL of P30 P23H-  
444 RFP/+ retinas (Fig 10). Rhodopsin mislocalization to the synapse layer and in the ONL  
445 cytoplasm was previously observed in P23H-Rho transgenic mice (31). This suggests that the  
446 ER expands throughout the entire cytoplasmic space in rods by P30 as a broad response to the  
447 accumulation of misfolded P23H-Rho protein in the ER.

448 Despite the expanded ER membranes filled with P23HhRhoRFP protein, the  
449 morphology of the CC and the OS disc structure was normal in P23H-RFP/+ rods at age P14  
450 (Fig 8A-B). At P30, the OS discs in some P23H-RFP/+ rods were slightly dysmorphic, but the  
451 CC structure appeared structurally intact, albeit longer than in +/+ rods (Fig 8C-D). The CC  
452 elongation in P23H-RFP/+ rods is a surprising result. Such an elongation phenotype was also  
453 described in knockout mouse models for 2 CC-localized proteins: male germ cell-associated  
454 kinase (Mak) and Huntingtin (59, 60). In both knockouts, the elongated CC was accompanied  
455 with aberrant OS morphology and Rho mislocalization. One possible cause of the elongated CC  
456 in P23H-RFP/+ mutant rods may be an early imbalance of Rho expression during an early  
457 ciliogenesis stage due to mutant P23H-Rho-RFP expression.

458 Our analysis of the rate of rod neuronal death using TUNEL staining of the ONL in  
459 P23H-RFP mouse retinas is additional evidence that P23H-RFP/+ mutant rods undergo a long-  
460 term neuroprotective response. Unlike in P23H-RFP/P23H-RFP homozygous retinas where the  
461 TUNEL+ rate in the ONL is elevated at P14, the rate of TUNEL+ nuclei spikes at P30 in P23H/+  
462 heterozygous retinas and returns to a level not significantly higher than +/+ retinas by P90 (Fig.

463 7C). Interestingly, a similar spike in TUNEL staining was also observed in both P23H-Rho  
464 transgenic rats at age P18 vs age P30 (32) and in the untagged P23H-Rho knockin mouse at  
465 age P19 vs P31 (61).

466 In conclusion, our RFP fusion knockin model of adRP retinal degeneration caused by the  
467 P23H rhodopsin mutation is a unique model for the disease with clear phenotypes that are  
468 traceable with both fluorescence microscopy and TEM. The mutant rods in our P23H-RFP/+  
469 mice demonstrate an adaptation that promotes rod photoreceptor survival, and thus the  
470 heterozygous mutant retinas have a mild rate of retinal degeneration. As such, our model will be  
471 useful to test the variety of proof-of-concept adRP therapies that have been developed across  
472 all P23H-Rho models in the field. These include: genetic suppression and replacement  
473 strategies (62, 63), CRISPR/Cas9 mutant allele deletions (64-66), genetic inhibition of the  
474 autophagy-activating *Atg5* (67), caspase pathway inhibitors (61, 68), a small molecule inhibitor  
475 of the photoreceptor specific transcriptional modulator Nr2e3 (69), and pharmacological  
476 treatments with valproic acid and other histone deacetylase (HDAC) inhibitors (70). Future  
477 studies that investigate the mechanisms of action for these therapies can be tested in this  
478 P23H-RFP mouse for the development of the most efficient and synergistic treatments of P23H-  
479 Rho and adRP.

480

## 481 **Materials and Methods**

### 482 *Animals*

483 The P23H-hRho-TagRFP knock-in mice were generated the same way we previously  
484 generated P23H-hRho-GFP knock-in mice (35), by gene targeting in the HPRT<sup>-</sup> embryonic stem  
485 (ES) cell line AB2.2 123, which was derived from mouse strain 129SvEv, essentially as  
486 described previously (41, 42). The targeting plasmid contained 5' and 3' sequences  
487 identical to flanking sequences of the mouse *rhodopsin* gene, an intervening sequence  
488 corresponding to the human *Rhodopsin* gene encoding the P23H mutation found in patients, a

489 C-terminal fusion with the fluorescent protein Tag RFP-T, a final C-terminal peptide  
490 corresponding to the C-terminal 9 residues of human rhodopsin (TETSQVAPA, the epitope for  
491 the 1D4 monoclonal antibody and a putative outer segment targeting signal), a STOP codon,  
492 and an endogenous polyadenylation signal, followed by an expression cassette (minigene) for  
493 human hypoxanthinephosphoribosyltransferase (HPRT). The HPRT minigene was flanked by  
494 loxP sites, so it could be looped out *in vivo* by passing through the germline of GDF-9-iCre mice  
495 (44) expressing Cre recombinase in oocytes. The plasmid also contained a minigene for  
496 Herpes Simplex Virus thymidine kinase (TK) outside the region of homology for negative  
497 selection against non-homologous insertion. We introduced the P23H mutation into the targeting  
498 vector by site-directed mutagenesis (QuikChange<sup>®</sup>, Stratagene). An IScel recognition site was  
499 engineered into the middle of the first intron in the rhodopsin gene at position 1340 from the  
500 start of translation, but it was not used in the experiments described here. The targeting vector  
501 was constructed in such a way that there is no Lox site between the MOPS promoter and the  
502 rhodopsin transcription unit.

503 The Darwin Transgenic Core Facility, Baylor College of Medicine, electroporated ES cells and  
504 injected correctly targeted ES cells (those selected for HPRT<sup>+</sup>TK<sup>-</sup> genotype) into blastocysts  
505 from albino C57BL/6-Tyr<sup>c-Brd</sup> mice (43). Founder mice carrying the HPRT-P23H-hRho-TagRFP  
506 allele were crossed to GDF-9-iCre mice (44) to remove the HPRT minigene and screened to  
507 ensure germline transmission of the correct targeted sequence without HPRT. P23H-hRho-  
508 TagRFP mice were extensively backcrossed to C57BL/6 mice. We validated that the knockin  
509 was successful by sequencing genomic DNA from the knockin mouse. We verified expression  
510 of the P23HhRhoRFP fusion by fluorescence microscopy of retinas and by immunoblotting (Fig.  
511 1, Fig. 2).

512 The P23H-human-rhodopsin-RFP (P23H-RFP) knockin mice were generated by the BCM  
513 Genetically Engineered Mouse core, using a strategy similar to the one previously described for

514 our P23H-Rho-GFP knockin (35). Homologous recombination in ES cells under positive HPRT  
515 selection (HAT medium) was carried out with a plasmid containing 5' and 3' sequences identical  
516 to flanking sequences of the mouse *rhodopsin* gene, an intervening sequence corresponding to  
517 the human *Rhodopsin* gene encoding the P23H mutation found in patients, a C-terminal fusion  
518 with the fluorescent protein Tag RFP-T, a final C-terminal peptide corresponding to the C-  
519 terminal 9 residues of human rhodopsin (TETSQVAPA, the epitope for the 1D4 monoclonal  
520 antibody and a putative outer segment targeting signal), a STOP codon, an endogenous  
521 polyadenylation signal, followed by an expression cassette (minigene) for human  
522 hypoxanthinephosphoribosyltransferase (HPRT). The HPRT minigene was flanked by loxP  
523 sites, so it could be looped out in vivo by passing through the germline of a *Zp3Cre* mouse  
524 expressing Cre recombinase in oocytes (71, 72).

525         The junction between the mouse and human *RHO* sequences is at the SacI site in the  
526 5'UTR between the transcription start sites and the translation start sites. Unlike our P23H-Rho-  
527 GFP knockin described previously (35), there was no lox site added to the 5'UTR, although  
528 there is a lone loxP site remaining in the 3'-end following loop-out of the HPRT minigene. The  
529 sequence of the P23H-hRho-TagRFP<sub>r</sub> allele was verified by Sanger sequencing. We generated  
530 a new hRho-EGFP knockin mouse line with an additional C-terminal 1D4 epitope sequence tag  
531 by a similar approach, using WT human rhodopsin sequence and EGFP coding sequence  
532 instead of Tag-RFP-T. Generation of the original hRho-EGFP knockin line was described  
533 previously (41)

534         Both P23H-RFP and hRho-EGFP-1D4 mice were extensively backcrossed to C57BL/6  
535 (>10 generations). Wild-type (+/+) C57BL/6 littermates were used as controls throughout this  
536 study. The following genotyping PCR primers were used for the P23HhRhoRFP knockin allele  
537 (5'- GTTCCGGAAGTGCATGCTCACCAC) and (5'- GGCGCTGCTCCTGGTGGG), which  
538 generate a 975 kb knockin band and 194bp WT band.



539 All animal research in this study was approved by the Institutional Animal Care and Use  
540 Committee at Baylor College of Medicine, and was carried out in accordance with the guidelines  
541 set forth in the Statement for the Use of Animals in Ophthalmic and Vision Research of the  
542 Association for Research in Vision and Ophthalmology (ARVO).

543

#### 544 *Western blotting*

545 Retinal lysates were made by needle extruding mouse retinas in ice-cold Cracking  
546 buffer: 25 mM Tris (pH 8), 300 mM sucrose, 15 mM EDTA, 2 mM MgCl<sub>2</sub> + 1x protease inhibitor  
547 cocktail (GenDepot), and lysates were cleared with centrifugation. Protein concentration was  
548 calculated with the BCA assay (Bio-Rad), and sample application buffer was added to lysates,  
549 which were sonicated to reduce sample viscosity. 100 µg of each lysate sample was loaded on  
550 10% acrylamide gels for SDS-PAGE. Gels were transferred onto nitrocellulose in Tris-Glycine-  
551 SDS buffer and probed with primary antibodies: anti-1D4 (Rho) at 1 µg/ml, anti-RFP (Kerafast,  
552 6a11f) at 1 µg/ml, anti-beta-actin (Cell Signaling Technology, 8HD10) diluted 1:1000. Mouse  
553 monoclonal anti-1D4 (73) was purified in-house from hybridoma culture medium. Membranes  
554 were secondary labeled with one of the following secondary antibodies: anti-mouse or anti-  
555 rabbit IRDye680 (LI-COR Biosciences), diluted 1:10,000, and were imaged on a LI-COR  
556 Odyssey imager. For clarity, the minimum and maximum input values from Western blot scans  
557 were adjusted maintaining a linear slope.

558

#### 559 *Retinal immunofluorescence*

560 For cyrosectioning, mouse eyes were enucleated and either 1) cornea punctured and  
561 immersion fixed in 4% paraformaldehyde (PFA) diluted in 1x PBS for 45 mins at room  
562 temperature before the cornea and lens were removed in 1xPBS, or 2) the cornea and lens  
563 were removed and 1xPBS and eye cups were directly embedded Optical Cutting Temperature  
564 (OCT) media in plastic cryomolds and flash frozen on a floating liquid nitrogen platform. Fixed

565 eye cups were cryoprotected in 30% sucrose before mounting in OCT in plastic molds and flash  
566 freezing. 8  $\mu\text{m}$  – 10  $\mu\text{m}$  cryosections were collected on poly-L-lysine coated glass slides (EMS),  
567 and unfixed eye cups sections were immediately fixed with 2% PFA for 2 minutes. This light  
568 fixation method was used for all immunolabeling experiments that included anti-centrin cilia  
569 immunolabeling. Superior-inferior positions were marked in eyes to be used for retina thickness  
570 measurements prior to enucleation to maintain proper orientation throughout fixation and  
571 sectioning.

572 For immunohistochemistry, sections were blocked with either 2% normal goat serum  
573 (NGS) (Fitzgerald), 2% bovine serum albumin (BSA) (Sigma), 2% fish skin gelatin (FSG)  
574 (Sigma), 0.2% saponin diluted in 1x PBS, or with SUPER block: 15% NGS, 5% BSA, 5% BSA-c  
575 (Aurion), 5% FSG, 0.2% saponin in 1xPBS (sections from Fig 7C-D, Fig 9, Fig 10). Blocked  
576 sections were probed with 0.5  $\mu\text{g}$  – 2  $\mu\text{g}$  of primary antibodies in the same blocking buffer  
577 overnight at room temperature, protected from light. The following antibodies were used: mouse  
578 anti-centrin (20H5) (EMD Millipore, 04-1624); rabbit anti-centrin 2 (Proteintech, 15877-1-AP);  
579 rabbit anti-BiP (Abcam, ab21685); mouse anti-KDEL (10C3) (Sigma-Aldrich, 420400); mouse  
580 anti-GM130 (35/GM130) (BD, 610822); rabbit anti-cone arrestin (EMD Millipore, AB15282).

581 Sections were washed in 1x PBS and probed with following secondary antibodies:  
582 F(ab')<sub>2</sub>-goat anti-mouse/anti-rabbit IgG Alexa 488 (Thermo Fisher), F(ab')<sub>2</sub>-goat anti-  
583 mouse/anti-rabbit IgG Alexa 555 (Thermo Fisher), or F(ab')<sub>2</sub>-goat anti-mouse/anti-rabbit IgG  
584 Alexa 647 (Thermo Fisher), diluted 1:500 in blocking buffer, for 1 – 1.5 hours at room  
585 temperature, protected from light. Sections were counterstained with 0.3  $\mu\text{M}$  DAPI for 1 hour  
586 protected from light. Widefield and confocal sections were mounted with #1.5 coverslips in  
587 VECTASHIELD (Vector Laboratories), and SIM sections were mounted in ProLong Glass  
588 (Thermo Fisher).

589 Widefield imaging was performed on an inverted Nikon Eclipse TE2000U microscope  
590 with mercury lamp excitation, a 10x objective (Nikon, Plan Fluor 10x) and imaging via a

591 Photometrics CoolSnap cf Photometrics digital camera (Roper Scientific) and excitation via a  
592 mercury lamp using dichroic mirrors and filters for excitation and emission wavelength selection.  
593 Full retina sections were generated by merging overlapping captures in Fiji/ImageJ using the  
594 “Stitching” plugin (74, 75). ONL thickness was measured from these full retina section files in  
595 Fiji/ImageJ. The position of the optic nerve was designated as position “0”; we then traced the  
596 DAPI+ ONL along the superior (positive nm positions) and inferior (negative nm positions)  
597 retina. At each position to be measured, we drew a rectangular Region of Interest with edges at  
598 the top and bottom of the ONL with a constant perpendicular length of 50  $\mu\text{m}$  at each position  
599 and collected ONL thickness measurements.

600 Confocal imaging was performed on either a Leica TCS-SP5 laser scanning confocal  
601 microscope with a 63x oil immersion objective (Leica, HC PL APO CS2 63.0x, numerical  
602 aperture 1.40) or a Zeiss LSM710 laser scanning microscopy with a 63x oil immersion objective  
603 (Zeiss Plan Apo 63.0x, numerical aperture 1.40). On both systems, sequential imaging scans  
604 with 405 diode, 488 nm argon, 543 nm HeNe, and 633 nm HeNe lasers were performed with  
605 parameters set to capture sub-saturation fluorescence and to avoid cross-talk. Z-stacks of 1  $\mu\text{m}$   
606 optical confocal sections were projected in Fiji/ImageJ based on maximum intensity values.

607 SIM imaging was performed on a DeltaVision OMX Blaze Imaging System (v4) (GE  
608 Healthcare) with a PLANPON6 60x / NA 1.42 (Olympus) oil immersion objective using oil with a  
609 refractive index of 1.520. The system features 488 nm, 568 nm and 647 nm laser lines, and a  
610 front illuminated Edge sCMOS (PCO) camera. Images were captured in sequential SIM mode  
611 with 15 fringe shift images acquired per optical section per channel. SIM reconstruction was  
612 subsequently performed in softWoRx 7 software. Z stacks of 125 nm optical SIM sections were  
613 projected in Fiji/ImageJ based on max intensity values.

614 All images were pseudo-colored and processed for clarity in Fiji/ImageJ; minimum and  
615 maximum input values were adjusted maintaining a linear slope. Magnified images of rod cilia  
616 were digitally straightened with the Straighten tool in Fiji/ImageJ.

617

## 618 *ERG*

619 Mice were dark adapted overnight and anesthetized with 90 mg/kg ketamine + 14 mg/kg  
620 xylazine. 0.5% tropicamide was added as a mydriatic to both eyes with 2.5% phenylephrine  
621 hydrochloride and 0.5% proparacaine hydrochloride for analgesia/anesthesia. 2.5%  
622 methylcellulose was used to maintain conductivity and for corneal hydration. A ground electrode  
623 was inserted into the mouse forehead, and wire electrode loops were placed over each eye. We  
624 used the UTAS BigShot Visual Electrodiagnostic System (LKC Technologies) for ERG  
625 recordings. Mice were placed within a Ganzfeld chamber and responses were recorded per a  
626 sampling rate of 2000 Hz using a 60 Hz notch filter. Scotopic recordings were averaged from 30  
627 flashes for the intensity range of -55 dB to -10 dB at 5 dB increments. Photopic recordings were  
628 collected after adapting the mouse to a constant background light (30 cd/m<sup>2</sup>) for 7 minutes.  
629 Recordings were averaged from 60 flashes for -10 dB and 0 dB intensities, and 20 flashes for 5  
630 dB and 10 dB intensities. We converted intensity values from dB to log[cd\*s/m<sup>2</sup>] values based  
631 on the instrument's calibration data.

632 ERG wave data was visualized and analyzed using a custom Mathematica code  
633 previously described (76). Scotopic a-wave amplitude was baseline to the minimum value of the  
634 first 35 ms post-flash. Scotopic b-waves were determined after a low pass filtering at 55 Hz;  
635 amplitudes were the a-wave minimum to the maximum of the filtered data between 30-120 ms  
636 post-flash. Implicit time was the time in ms between the a-wave to the b-wave values. Photopic  
637 b-wave waves were also filtered and were baseline to the maximum between 30-120 ms post-  
638 flash.

639

## 640 *Transmission Electron Microscopy*

641 The following TEM preparation, based on (8), enhances staining and contrast of internal  
642 cell membranes in rod photoreceptors. Mouse eyes for TEM were cornea punctured in the

643 following ice-cold TEM fixative: 2% PFA, 2% glutaraldehyde (EMS), 2.2mM CaCl<sub>2</sub> diluted in 50  
644 mM MOPS buffer (pH 7.4) and were then immersion fixed in the same fixative for either 1) 45  
645 mins at room temperature with gentle agitation followed by cornea and lens removal and  
646 another 1.5 hours on ice, or 2) 4°C overnight before cornea and lens removal. Fixed eye cups  
647 were embedded in 4% low melt agarose, and 150 µm vibratome sections were cut along the  
648 longitudinal plane. Sections were fixed in 1% tannic acid (EMS), 0.5% saponin (Calbiochem)  
649 diluted in 0.1 M HEPES (pH 7.3) for 1 hour at room temperature with gentle rocking. After  
650 rinsing again, sections were stained with 1% uranyl acetate (EMS) diluted in 0.1 maleate buffer  
651 (pH 6) for 1 hour at room temperature with gentle rocking.

652         Sections were then dehydrated in the following ethanol series: 50%, 70%, 90%, 100%,  
653 100%, in half dram glass vials filled with 1 mL of dehydrant. For Eponate 12 embedding,  
654 sections were additionally dehydrated in 100% acetone 2x, for 15 minutes. Using the solutions  
655 of the PELCO Eponate 12 kit with DMP-30 (Ted Pella), a medium hardness resin mix (without  
656 accelerator) was prepared and mixed. After dehydrating, the sections were embedded in stages  
657 of Eponate 12 resin mix to acetone for the following incubation times: 50%:50% (5 hours),  
658 75%:25% (overnight, 16-20 hours), 100% resin mix (8 hours), 100% resin mix (overnight, 16-20  
659 hours). The DMP-30 accelerator was added to the Eponate 12 resin mix just before mixing or  
660 incubating. All embedding steps were incubated on a room temperature roller set to a slow  
661 speed.

662         Resin embedded sections were then mounted in full resin either between two sheets of  
663 ACLAR Film (EMS) or in an inverted BEEM embedding capsules (EMS). Mounted sections  
664 were cured at 65°C for at least 48 hours. 70-100 nm ultrathin resin sections were cut on a Leica  
665 UC6 ultramicrotome with a Diatome diamond knife. Ultrathin sections were collected onto  
666 cleaned 100 mesh copper grids (EMS). Grids for TEM were post-stained on glue sticks first in  
667 1.2% uranyl acetate (diluted in Milli-Q water) for 4-6 minutes, then in Sato's Lead for 4-6  
668 minutes after rinsing in boiled Milli-Q water and drying. Grids were rinsed again and dried before

669 storage. Imaging was performed on either a Hitachi H7500 TEM or JEOL JEM-1400 at  
670 magnifications up to 25000x. TEM images were processed for clarity in Fiji/ImageJ by adjusting  
671 the minimum and maximum input values (maintaining a linear slope) for contrast and with the  
672 Straighten tool.

673

#### 674 *RNA extraction and relative quantification of mRNA*

675 Six pairs of retinas from three postnatal day 30 (P30) WT C57BL/6 mice and three P30  
676 P23H-RFP/+ heterozygous mice were collected and homogenized for RNA extraction. Direct-  
677 zol™ RNA MiniPrep Kit (Genesee Scientific/Zymo Research, Catalog No: R2051) was used for  
678 RNA extraction and 25µl of DNase/RNase free was used for elution. RNA extraction product  
679 was diluted 20-fold in DNase/RNase free water (from Zymo Research Direct-zol™ RNA  
680 MiniPrep Kit) before recording the UV absorbance spectra on a Hewlett Packard 8452 Diode  
681 Array Spectrophotometer. Only RNA samples with  $1.7 \leq A_{260}/A_{280} \text{ ratio} \leq 2.0$  was used for  
682 Reverse Transcription Polymerase Chain Reaction (RT-PCR) experiments. 5 µl of the RNA  
683 extraction product was run on a 1% agarose gel to examine purity. RNA samples with 28S/18S  
684 ratio  $\geq 2$  were used for analysis. The total RNA input for each RT-PCR reaction was 500 ng.  
685 RT-PCR was performed using LunaScript RT SuperMix Kit (New England Biolabs – Catalog No:  
686 E3010L). Each Complementary DNA (cDNA) sample from RT-PCR was diluted 100-fold prior to  
687 quantitative Polymerase Chain Reaction (qPCR). In the Amplifyt™ 96-Well PCR Plate (Thomas  
688 Scientific, Catalog No: 1148B05), 4 ul of the diluted cDNA was added per qPCR reaction  
689 followed by 16ul of master mix with target gene qPCR primers (See primer nucleotide  
690 sequences in Table 1), Luna® Universal qPCR Master Mix (New England Biolabs, Catalog No:  
691 M3003L) and DEPC treated water. Per qPCR run, three technical replicates were run per  
692 biological replicate. Plates were sealed by LightCycler® 480 Seal Foil (Roche Life Science,  
693 Catalog No: 04 729 757 001) then spun down in a mini plate spinner. The qPCR reactions were  
694 carried out using the C1000 Touch™ Thermal Cycler (BioRad) and the SYBR fluorescent data

695 collected using the CFX96 Optical Reaction Module for Real-Time PCR Systems (BioRad).  
696 Reactions with primers specific for the genes encoding HPRT1 and RPL19 were carried out in  
697 parallel for normalization. Data were extracted from CFX BioRad Manager 3.1 as 2007 Excel  
698 files.  $C_q$  values from 3 technical replicates (with standard deviation  $\leq 0.25$ ) were averaged then  
699 converted to Relative Quantification Value (RQ value) following Livak Method. Graph design  
700 and statistical significance analysis of calculated RQ values were carried out using GraphPad  
701 Prism 8.4.3. A 95% confidence interval for a two-tailed t-Test was used as the criterion for  
702 statistical significance.  $P$  values for the two-tailed t-tests are reported.  
703

**Table 1: Q-RTPCR Primer Nucleotide Sequences:**

| Gene  | Forward Primer              | Reverse Primer                | Source* |
|-------|-----------------------------|-------------------------------|---------|
| HPRT  | 5'-CAGTCCCAGCGTCGTGATTA-3'  | 5'-TGGCCTCCCATCTCCTTCAT-3'    |         |
| RPL19 | 5'-ATGCCAACTCCCCTCAGCAG-3'  | 5'-TCATCCTTCTCATCCAGGTCACC-3' | (77)    |
| BiP   | 5'-ACTTGGGACCACCTATTCCT-3'  | 5'-ATCGCCAATCAGACGCTCC-3'     | (78)    |
| DERL1 | 5'-CGCGATTTAAGGCCTGTTAC-3'  | 5'-GGTAGCCAGCGGTACAAAAA-3'    | (77)    |
| XBP1  | 5'-GAGTCCGCAGCAGGTG-3'      | 5'-GTGTCAGAGTCCATGGGA-3'      | (77)    |
| CHOP  | 5'-CTGGAAGCCTGGTATGAGGAT-3' | 5'-CAGGGTCAAGAGTAGTGAAGGT-3'  | (78)    |
| ATF6  | 5'-TGCCTTGGGAGTCAGACCTAT-3' | 5'-GCTGAGTTGAAGAACACGAGTC-3'  | (78)    |
| PERK  | 5'-AGTCCCTGCTCGAATCTTCTT-3' | 5'-TCCAAGGCAGAACAGATATACC-3'  | (78)    |
| EIF2a | 5'-TATCCCAACTTTGCCGGACC-3'  | 5'-AGGCTCCTGTCTTGTCAACC-3'    |         |
| mRho  | 5'-CCATGGCAGTTCTCCATGCT-3'  | 5'-CATCTCCCAGTGATTCTTGCC-3'   |         |
| mhRho | 5'-CCATGGCAGTTCTCCATGCT-3'  | 5'-TTCTCCCCGAAGCGGAAGTT-3'    | (62)    |

\*All primer sequences not sourced from the literature were designed with Primer-BLAST (NCBI) for

specificity and to span exon-exon junctions.



707

708 *Statistical analysis*

709 Unpaired Student's t-tests, Two-way ANOVA with Šídák multiple comparison tests, and  
710 cubic spline curve fittings were performed in GraphPad Prism® software. Each decline in ONL  
711 width with age was fit to a single exponential decay as  $W(t) = (W(0) - W(\infty))\exp(-t/\tau) + W(\infty)$   
712 Where  $W(t)$  is the measured width at age,  $W(\infty)$  is the plateau value to which it declines,  $W(0)$   
713 is an initial value, and  $\tau$  is the time constant. The data were fit to the equation with  $W(0)$ ,  $W(\infty)$   
714 and  $\tau$  as floating fit parameters in a Marquardt-Levenberg least-squares fitting algorithm using  
715 Prism®.

716

717 **Acknowledgements**

718 The authors would like to thank Dr. Ching-Kang Jason Chen and Dr. Melina Agosto for help with  
719 ERG recordings and analysis. This work was supported in part by NIH research grants R01-  
720 EY01173, R01EY026545 and R01EY031949, core grants P30EY002520 and P30CA125123,  
721 MAR was supported by a grant from the Knights Templar Eye Foundation and NIH grant F32-EY027171.

722

723

724 **Author Contributions**

725 MAR, FC, VN, LK and FH performed experiments, analyzed data and contributed to writing.

726 MAR wrote the original draft. TGW and JHW provided funding, supervised aspects of the  
727 projects, analyzed data and edited the manuscript.

728

730 **Figure Legends**

731 **Figure 1. Construction and validation of the P23H-hRho-TagRFP-T knockin mouse. (A)**

732 Targeting construct used in embryonic stem cells and resulting gene structure after germline

733 transmission. (B) A map of the knock-in human P23H-rhodopsin-RFP fusion gene. A portion of

734 the sequence of exon 1 from the P23H-Rho allele in the fusion gene (blue) is aligned to the

735 same human wild-type (WT) Rho allele sequence (black). The mutated codon 23 is in **bold** font.

736 The transition sequence from the 1D4 terminal signal sequence to the Tag-RFP-T with a short

737 linker sequence is shown in the middle sequence panel and the C-terminal sequence with the

738 extra 1D4 epitope sequence appended to the end Tag-RFP-T prior to the stop codon. (C)

739 Western blot confirmation of the P23HhRhoRFP fusion protein expression in P23H-RFP/+

740 heterozygous retinas. Retinal lysates are from a wild-type (+/+) mouse, age P22, and a P23H-

741 RFP/+ mouse, age 45; 100 µg of total protein from each lysate was loaded onto SDS-PAGE

742 gels. Blot membranes were probed with either of the following antibodies: anti-1D4, anti-RFP or

743 anti-beta (β)-actin (a loading control). Blot scans for the protein ladder were used to mark

744 molecular weight sizes (in kilodaltons, kDa) on the left of each blot image. The ~65 kDa

745 P23HhRhoRFP fusion protein band is present in the P23H-RFP/+ lane in both anti-1D4 and

746 anti-RFP blot scans (magenta arrows). The monomeric mouse Rho protein band is in both lanes

747 in the anti-1D4 blot scan (black arrow). Higher MW species are formed by rhodopsin

748 multimerization.

749 **Figure 2. Localization of RFP fluorescence in the P23H-hRho-RFP knockin mouse retina.**

750 (A) Widefield fluorescence images of mouse retinal cryosections from age-matched P30 wild-

751 type (+/+), heterozygous (P23H-RFP/+) and homozygous knockin mice (P23H-RFP/P23H-

752 RFP). Sections were counterstained with DAPI to label nuclei in the retina (blue). RFP

753 fluorescence from the mutant P23HhRhoRFP fusion protein is shown in magenta. Magnified

754 regions from each section are insets, and the outer nuclear layer (ONL) of each retina, which is

755 the location of the DAPI+ photoreceptor nuclei, is demarcated. (B) Confocal z-projection image

756 of a retinal cryosection from a P30 heterozygous P23H-RFP/+ mouse. The brightest RFP signal  
757 is in the outer photoreceptor layers, the inner segment and outer segment region (IS/OS), where  
758 P23HhRhoRFP protein is localized in aggregates. In the same image, with the gain of the RFP  
759 signal raised to saturation, additional P23HhRhoRFP protein is observed in the rod  
760 photoreceptor synapses within the outer plexiform layer (yellow arrows). To a lesser degree,  
761 P23HhRhoRFP is also localized in the ONL, in the cytoplasm surrounding the photoreceptor  
762 nuclei (white arrows). (C) Confocal z-projection through a retinal cryosection from a P30 P23H-  
763 RFP/P23H-RFP homozygote. The width of the DAPI-positive ONL is thinner compared to the  
764 heterozygote. In the homozygous retina, mutant P23HhRhoRFP fusion protein is also more  
765 prominently localized in the ONL compared to the heterozygote. INL = inner nuclear layer.

766 **Figure 3. P23HhRhoRFP+ fusion aggregates are localized in the inner segments of rod**  
767 **photoreceptor neurons.** (A) In a confocal z-projection image of a retinal section from the  
768 hRho-GFP-1D4/P23H-RFP heterozygous mouse retina, at 3 weeks of age, the wild-type hRho-  
769 GFP fusion (green), which has an additional C-terminal 1D4 signal sequence, is correctly  
770 localized to the outer segments (OS) of rod neurons. In this retina, RFP+ aggregates containing  
771 mutant P23HhRhoRFP protein (magenta) are primarily located in the inner segments (IS) of  
772 rods and almost entirely segregated from the GFP+ OS layer. White dotted lines in the figure  
773 demarcate the OS/IS boundary and the IS/outer nuclear layer (ONL) boundary. (B) In SIM  
774 micrographs of retinal sections from the same heterozygous mouse line at age 6 weeks, GFP+  
775 OS and RFP+ IS aggregates remain segregated with no apparent co-localization. (C) In SIM  
776 images of retinal sections from an alternate GFP/RFP heterozygote at age P30, in which the  
777 wild-type hRho-GFP fusion does not have an additional 1D4 signal peptide, the GFP  
778 fluorescence is not exclusively located in the OS layer, but rather is partially mislocalized with  
779 P23H-hRho-RFP. In a magnified example, hRho-GFP is co-localized around and within a  
780 P23HhRhoRFP aggregate (yellow arrows). In another magnified example, hRho-GFP is  
781 wrapped around an P23HhRhoRFP aggregate (white arrow).

782 **Figure 4. Mutant P23H-hRho-RFP inner segment aggregates are localized near the basal**  
783 **body in rod neurons.** (A) In a SIM z-projection image of a retinal section from the P23H-RFP/+  
784 mouse at age P14, centrin immunolabeling (green) marks the location of rod connecting cilium  
785 (CC) and basal body (BB) relative to the P23HhRhoRFP fluorescent aggregates (magenta). In  
786 magnified views, single RFP+ inner segment aggregates are located just proximal to the CC  
787 (yellow arrow) and BB (white stars). The BB region is demarcated by the centrin+ mother  
788 centriole at the proximal end of the CC and the daughter centriole, which is a separated centrin+  
789 puncta beneath the mother centriole. (B) A SIM image of a retinal section from the P23H-RFP/+  
790 mouse at age P30 also with centrin immunolabeling. In magnified views, the RFP+ aggregates  
791 at P30 are still generally located proximal to the BB (white stars), with some examples of RFP  
792 overlapping with the BB region. The organization of the RFP+ aggregates in these P30 rods are  
793 less compact and more reticulated compared to the examples from age P14 (see examples in  
794 A).

795 **Figure 5. Time course of retinal degeneration in P23H-RFP/+ heterozygous and P23H-**  
796 **RFP/+ homozygous mice.** (A) Confocal z-projection images of retinal cryosections from wild-  
797 type (+/+), and P23H-RFP heterozygote (het) and P23H-RFP/P23H-RFP homozygous (homo)  
798 mice at various time points. DAPI (blue) labels photoreceptor nuclei in the outer nuclear layer  
799 (ONL) and the bipolar cell nuclei in the inner nuclear layer (INL). RFP fluorescence (magenta) is  
800 primarily located in the inner segment layers of het retinas at all time points, while RFP is also  
801 located in the ONL in homo retinas. At P90, the homo ONL is reduced to very few disorganized  
802 nuclei surrounded by RFP. (B) Time course plot of ONL thickness between genotypes.  
803 Measurements correspond to the ONL thickness of the retina 500  $\mu\text{m}$  inferior to the optic nerve.  
804 Unfilled shapes correspond to the mean value, and error bars signify standard error of the  
805 mean. Solid lines represent fits to exponential decays to plateau, as described in Methods.  
806 Unpaired t-tests were calculated to compare +/+ and het values for significance. Comparisons  
807 with significant differences are: P61 +/+ vs P60 het (\*\* $p=0.0081$ ), P90 +/+ vs P90 het

808 (\*\*p=0.0072), and P330 +/+ vs P364 het (\*\*p=0.0035). (C) “Spider” plots of ONL thickness for  
809 13 positions in +/+ retinal cryosections from the P14, P30 and P90 time points, spanning  
810 positions from the optic nerve to the inferior and superior retina. Positions directly adjacent to  
811 the optic nerve position (“0”) correspond to 100 µm superior and inferior to the optic nerve. The  
812 most peripheral positions of each plot correspond to 100 µm from the superior and inferior ends  
813 of the retina. For each position on the plots, circles correspond to mean values and error bars  
814 signify standard error of the mean. (D) Corresponding spider plots for P14, P30, and P90 P23H-  
815 RFP/+ het retinal cryosections. Tests for statistical differences between plots from different time  
816 points were performed using Two-way ANOVA with Šídák multiple comparisons test. The only  
817 test with significance is P14 het vs P90 het (\*P=0.0215). (E) Spider plots for P23H-RFP  
818 homozygous retinal cryosections at the same time points. Two-way ANOVA with Šídák multiple  
819 comparison tests produced significant differences between all time points: P14 vs P30, P14 vs  
820 90, and P30 vs P90 (all \*\*\*\*P<0.0001). (F) Spider plots for all retinal cryosections at timepoint  
821 P30 to compare differences between genotypes. Two-way ANOVA with Šídák multiple  
822 comparison tests produced significant differences at P30 between: +/+ vs homo and het vs  
823 homo. (both \*\*\*\*P<0.0001). (G) Spider plots for timepoint P90 to compare genotypes. Two-way  
824 ANOVA with Šídák multiple comparison tests produced significant differences at P90 between:  
825 +/+ vs homo. and het. vs homo. (both \*\*\*\*P<0.0001).

826 **Figure 6. P23H-RFP/+ heterozygous mice have slightly reduced rod photoreceptor**  
827 **electroretinogram (ERG) responses.** (A) Example ERG recordings from +/+ wild-type, P23H-  
828 RFP/+ heterozygous (het) and P23H-RFP/P23H-RFP homozygous (homo) mice at age P30. (B)  
829 Aggregate of P30 scotopic a-wave amplitudes. In all plots, solid shapes are data points, empty  
830 shapes signify mean values, and error bars signify standard error of the mean. Statistical  
831 comparison tests of all the ERG data were performed using Two-way ANOVA with Šídák  
832 multiple comparisons tests. All statistical comparisons of P30 a-wave amplitudes were  
833 significant: +/+ vs het (\*\*\*\*P<0.0001), +/+ vs homo (\*\*\*\*P<0.0001), and het vs homo

834 (\*\*\*\* $P < 0.0001$ ). (C) Scotopic a-wave amplitudes between P30 and P90 P23H/+ het mice were  
835 not statistically different ( $P = 0.27$ ). (D) Aggregate of P30 scotopic b-wave amplitudes.  
836 Statistically significant differences were calculated for +/+ vs homo (\*\*\*\* $P < 0.0001$ ) and het vs  
837 homo (\*\*\*\* $P < 0.0001$ ). WT vs het was not statistically different ( $P = 0.9744$ ) (E) Scotopic b-wave  
838 amplitudes between P30 and P90 P23H/+ het mice were not statistically different ( $P = 0.9375$ ).  
839 (F) Aggregate implicit times, the time to peak scotopic b-wave post a-wave, in P30 +/+ and het  
840 mice. P30 het mice had higher implicit times than +/+ at intermediate flash stages, but the  
841 difference over the entire flash range was not statistically significant ( $P = 0.5651$ ). (G) Aggregate  
842 of P30 photopic b-wave amplitudes. There were no statistically significant differences among  
843 the genotypes: +/+ vs het ( $P = 0.749$ ), +/+ vs homo ( $P = 0.1298$ ), het vs homo ( $P = 0.1553$ ).

844 **Figure 7. Cone immunolocalization and TUNEL analysis of photoreceptor cell death in**  
845 **P23H-hRho-RFP retinas.** (A, B) Examples of cone arrestin immunofluorescence staining  
846 (yellow) in retinal sections from ages P30 (A) and P90 (B), among +/+, P23H-RFP/+, and P23H-  
847 RFP/P23H-RFP mice. DAPI staining (blue) labels both photoreceptor nuclei in the outer nuclear  
848 layer (ONL) and in the inner nuclear layer (INL). (C) TUNEL fluorescence analysis of  
849 photoreceptor cell in retinal cryosections. Shown are examples of age P30 retinal sections from  
850 +/+, P23H-RFP/+ heterozygous (het), and P23H-RFP/P23H-RFP homozygous (homo) mice  
851 with TUNEL+ nuclei (green) within the DAPI stained nuclei of the ONL (blue). RFP fluorescence  
852 is magenta. (D) Time course plot of aggregate TUNEL+ nuclei/mm<sup>2</sup> measurements among all  
853 genotypes at multiple time points. Statistical comparisons among groups were performed using  
854 unpaired t-tests. At P14, homo retinas have statistically more TUNEL+ nuclei compared to both  
855 +/+ (\* $P = 0.0167$ ) and het (\*\* $P = 0.0098$ ) retinas. At P30, het retinas have statistically more  
856 TUNEL+ nuclei compared to +/+ retinas (\* $P = 0.042$ ), but the rate of TUNEL+ nuclei between  
857 het and +/+ retinas is not statistically different at age P90 ( $P = 0.312$ ).

858 **Figure 8. mRNA levels of ER stress and Unfolded Protein Response markers are near**  
859 **normal in P23H-RFP/+ heterozygous retinas at postnatal day 30.** Results of Q-RTPCR



860 measurements of the indicated messages in RNA extracted from retinas of heterozygotes as  
861 compared to wild-type (+/+) (n=3 for both), normalized to HPRT (dark grey bars) or RPL19  
862 (open bars). Statistical comparisons were made with two-tailed t-tests.: mhRho vs. RPL19 \*\*P =  
863 0.0099; mhRho vs. HPRT \*\*\*P=0.000741.; mRho vs. RPL19 \*\*\*P=0.000585. mRho vs. HPRT  
864 \*\*\*P=0.000542.

865 **Figure 9. P23H-Rho-RFP/+ mutant rod photoreceptor neurons have distended inner**

866 **segments filled with ectopic membranes.** (A-B) Conventional transmission electron

867 microscopy (TEM) images of rod photoreceptor neurons at age P14 from either (A) +/+ or (B)

868 P23H-RFP/+ heterozygous (het) mice. In each example rod, the inner segment (IS) is outlined

869 with yellow lines. The IS max width in P14 P23H-RFP/+ rods is significantly greater than +/+

870 rods (het:  $2.967 \mu\text{m} \pm 0.508 \mu\text{m}$  (standard deviation, sd) (n=14) vs +/+:  $1.974 \pm 0.481 \mu\text{m}$  (sd)

871 (n=19),  $P < 0.0001$ , unpaired t-test). Ectopic stacks of IS membranes in the swollen P23H-

872 RFP/+ IS are marked with magenta arrows. Double-membraned autophagy compartments are

873 marked with magenta asterisks in the mutant P23H-RFP/+ IS. In magnified views of example

874 connecting cilia (CC) from each genotype, the length of the CC – measured by the densely

875 stained CC membrane – is indicated. In aggregate, the length of the CC in P23H-RFP/+ rods is

876 significantly greater than +/+ CC (het:  $1.548 \mu\text{m} \pm 0.206 \mu\text{m}$  (sd) (n=13) vs +/+:  $1.27 \mu\text{m} \pm 0.247$

877  $\mu\text{m}$  (sd) (n=11),  $P = 0.0066$ , unpaired t-test). (C) At age P30, the ectopic IS membranes in

878 P23H/+ rods appear more dysmorphic compared to P14 (magenta arrows). In addition, some

879 outer segments disc membranes within or adjacent to P23H-RFP/+ rods with IS defects are also

880 disrupted and appear dysmorphic (green arrows). (D) In examples of the CC and basal OS

881 regions of P30 P23H/+ rods, the structure of the CC and basal body remain intact despite being

882 adjacent to ectopic IS membranes (magenta arrows); however, there is evidence that basal OS

883 disc morphogenesis is disrupted possibly due to OS axoneme instability (green arrows).

884 **Figure 10. Mutant P23H-hRho-RFP protein is accumulated within ER membranes in P23H-**

885 **RFP/+ mouse rods.** (A-B) Confocal z-projection images of a retinal cryosection from P14

886 P23H-RFP/+ and +/+ littermate mice, immunolabeled for either the ER luminal marker  
887 BiP/GRP78 (green) (A) or the Golgi marker GM130 (green) (B). P23HhRhoRFP fluorescence is  
888 magenta. Co-localized BiP with RFP+ aggregates in the P14 P23H-RFP/+ retina section is  
889 marked with white arrows. GM130+ Golgi membranes do not co-localize with RFP+ aggregates  
890 and appear unaffected in the P14 P23H-RFP/+ retina compared to +/+ sections. (C) SIM z-  
891 projection images of a retina cryosection from an age P30 P23H-RFP/+ mouse that is  
892 immunolabeled for BiP (green) and centrin (white), which labels the connecting cilium (CC) and  
893 basal body (BB). RFP fluorescence is magenta. In a magnified inner segment (IS), BiP  
894 colocalization with a P23HhRhoRFP aggregate is marked with white arrows. BiP+ ER near the  
895 cilium that is not colocalized with RFP is marked with yellow arrows. (D) Within the same SIM  
896 images, the BiP+ ER tightly surrounds a P23HhRhoRFP aggregate (white arrows). (E) In age  
897 P30 +/+ SIM control images, BiP immunolabeling marks the inner segment ER network that  
898 leads to the cilium. (F) SIM z-projections of age P30 P23H-RFP/+ retinal sections  
899 immunolabeled for KDEL, another ER lumen marker (green), along with centrin (white) and RFP  
900 (magenta). KDEL puncta are more diffuse than BiP, but the localization pattern in the IS is  
901 similar; KDEL co-localization with the P23H-RFP aggregates (white arrows) and KDEL+ ER  
902 near the basal body that is not associated with RFP (yellow arrows) are labeled. (G) In age P30  
903 +/+ SIM control images, KDEL immunolabeling (green) labels puncta throughout the inner  
904 segment. (H) SIM images of a P23H-RFP/+ retina cryosection at age P30 immunolabeled for  
905 GM130, a Golgi membrane marker (green), along with centrin (white) and RFP (magenta).  
906 Overall, The Golgi is proximally localized to the RFP+ aggregates at P30, but in some examples  
907 the Golgi network reaches the centrin+ cilium. On a subcellular scale, the Golgi membranes are  
908 generally segregated from RFP aggregates (yellow arrows), but small pieces of Golgi  
909 membrane are found co-localized with some RFP aggregates (white arrows). (I) In age P30 +/+  
910 SIM control images of retinal cryosections, the Golgi is predominantly dissociated from the cilia;  
911 however, examples of +/+ rods with GM130+ Golgi membrane networks that reach the basal

912 body are shown. Gray dotted arrows throughout mark a region that is magnified from the same  
913 image.

914

915 **Figure 11. Localization of P23HhRh-RFP protein with the ER in the outer plexiform layer**

916 **(OPL) of P23H-RFP/+ retinas.** (A) A SIM z-projection image of a P23H-RFP/+ retinal  
917 cryosection, age P30, immunolabeled for BiP/GRP78 to label the ER (green) in the OPL and  
918 surrounding area. P23HRhoRFP protein (magenta) fills the rod photoreceptor synapses in this  
919 region. BiP+ ER labeling is present throughout the OPL and the outer nuclear layer (ONL). In a  
920 magnified view of a pair of synapses, P23HhRhRhoRFP protein is co-localized with the BiP+ ER  
921 staining. (B) In a similar SIM magnified view of a P30 P23H-RFP/+ retina section  
922 immunostained for KDEL (green), P23HRhoRFP protein is also co-localized with KDEL+ ER  
923 staining. (C) As a control SIM image, a P30 P23H-RFP/+ retina section is immunostained for  
924 GM130 to label Golgi. No Golgi membranes are evident in the OPL; however, they are present  
925 in the inner nuclear layer (INL).

926

## 937 References

- 938 1. Daiger SP, Sullivan LS, Bowne SJ. Genes and mutations causing retinitis pigmentosa.  
939 Clin Genet. 2013;84(2):132-41.
- 940 2. Hamel C. Retinitis pigmentosa. Orphanet journal of rare diseases. 2006;1:40.
- 941 3. Frederick JM, Hanke-Gogokhia C, Ying G, Baehr W. Diffuse or hitch a ride: how  
942 photoreceptor lipidated proteins get from here to there. Biol Chem. 2020;401(5):573-84.
- 943 4. Palczewski K. G protein-coupled receptor rhodopsin. Annu Rev Biochem. 2006;75:743-  
944 67.
- 945 5. Bok D. Retinal photoreceptor-pigment epithelium interactions. Friedenwald lecture.  
946 Invest Ophthalmol Vis Sci. 1985;26(12):1659-94.
- 947 6. Kevany BM, Palczewski K. Phagocytosis of retinal rod and cone photoreceptors.  
948 Physiology (Bethesda). 2010;25(1):8-15.
- 949 7. Steinberg RH, Fisher SK, Anderson DH. Disc morphogenesis in vertebrate  
950 photoreceptors. J Comp Neurol. 1980;190(3):501-8.
- 951 8. Ding JD, Salinas RY, Arshavsky VY. Discs of mammalian rod photoreceptors form  
952 through the membrane evagination mechanism. J Cell Biol. 2015;211(3):495-502.
- 953 9. Roepman R, Wolfrum U. Protein networks and complexes in photoreceptor cilia. Subcell  
954 Biochem. 2007;43:209-35.
- 955 10. Wensel TG, Potter VL, Moye A, Zhang Z, Robichaux MA. Structure and dynamics of  
956 photoreceptor sensory cilia. Pflugers Arch. 2021.
- 957 11. Nachury MV. The molecular machines that traffic signaling receptors into and out of cilia.  
958 Curr Opin Cell Biol. 2018;51:124-31.
- 959 12. Pearring JN, Salinas RY, Baker SA, Arshavsky VY. Protein sorting, targeting and  
960 trafficking in photoreceptor cells. Prog Retin Eye Res. 2013;36:24-51.
- 961 13. Athanasiou D, Aguila M, Bellingham J, Li W, McCulley C, Reeves PJ, et al. The  
962 molecular and cellular basis of rhodopsin retinitis pigmentosa reveals potential strategies for  
963 therapy. Progress in Retinal and Eye Research. 2018;62:1-23.
- 964 14. Dryja TP, McGee TL, Reichel E, Hahn LB, Cowley GS, Yandell DW, et al. A point  
965 mutation of the rhodopsin gene in one form of retinitis pigmentosa. Nature. 1990;343(6256):364-  
966 6.
- 967 15. Sullivan LS, Bowne SJ, Birch DG, Hughbanks-Wheaton D, Heckenlively JR, Lewis RA,  
968 et al. Prevalence of disease-causing mutations in families with autosomal dominant retinitis  
969 pigmentosa: a screen of known genes in 200 families. Invest Ophthalmol Vis Sci.  
970 2006;47(7):3052-64.
- 971 16. Kaushal S, Khorana HG. Structure and Function in Rhodopsin. 7. Point Mutations  
972 Associated with Autosomal Dominant Retinitis Pigmentosa. Biochemistry. 1994;33(20):6121-8.
- 973 17. Saliba RS, Munro PM, Luthert PJ, Cheetham ME. The cellular fate of mutant rhodopsin:  
974 quality control, degradation and aggresome formation. J Cell Sci. 2002;115(Pt 14):2907-18.
- 975 18. Sung CH, Schneider BG, Agarwal N, Papermaster DS, Nathans J. Functional  
976 heterogeneity of mutant rhodopsins responsible for autosomal dominant retinitis pigmentosa.  
977 Proc Natl Acad Sci U S A. 1991;88(19):8840-4.
- 978 19. Lewin AS, Drenser KA, Hauswirth WW, Nishikawa S, Yasumura D, Flannery JG, et al.  
979 Ribozyme rescue of photoreceptor cells in a transgenic rat model of autosomal dominant  
980 retinitis pigmentosa. Nat Med. 1998;4(8):967-71.
- 981 20. Olsson JE, Gordon JW, Pawlyk BS, Roof D, Hayes A, Molday RS, et al. Transgenic  
982 mice with a rhodopsin mutation (Pro23His): a mouse model of autosomal dominant retinitis  
983 pigmentosa. Neuron. 1992;9(5):815-30.
- 984 21. Ross JW, Fernandez de Castro JP, Zhao J, Samuel M, Walters E, Rios C, et al.  
985 Generation of an inbred miniature pig model of retinitis pigmentosa. Invest Ophthalmol Vis Sci.  
986 2012;53(1):501-7.

- 987 22. Tam BM, Moritz OL. Characterization of rhodopsin P23H-induced retinal degeneration in  
988 a *Xenopus laevis* model of retinitis pigmentosa. *Invest Ophthalmol Vis Sci.* 2006;47(8):3234-41.
- 989 23. Bogeia TH, Wen RH, Moritz OL. Light Induces Ultrastructural Changes in Rod Outer and  
990 Inner Segments, Including Autophagy, in a Transgenic *Xenopus laevis* P23H Rhodopsin Model  
991 of Retinitis Pigmentosa. *Invest Ophthalmol Vis Sci.* 2015;56(13):7947-55.
- 992 24. Santhanam A, Shihabeddin E, Atkinson JA, Nguyen D, Lin YP, O'Brien J. A Zebrafish  
993 Model of Retinitis Pigmentosa Shows Continuous Degeneration and Regeneration of Rod  
994 Photoreceptors. *Cells.* 2020;9(10).
- 995 25. Olsson JE, Gordon JW, Pawlyk BS, Roof D, Hayes A, Molday RS, et al. Transgenic  
996 mice with a rhodopsin mutation (Pro23His): A mouse model of autosomal dominant retinitis  
997 pigmentosa. *Neuron.* 1992;9(5):815-30.
- 998 26. Liu X, Wu TH, Stowe S, Matsushita A, Arikawa K, Naash MI, et al. Defective  
999 phototransductive disk membrane morphogenesis in transgenic mice expressing opsin with a  
1000 mutated N-terminal domain. *J Cell Sci.* 1997;110 ( Pt 20):2589-97.
- 1001 27. Wu TH, Ting TD, Okajima TIL, Pepperberg DR, Ho YK, Ripps H, et al. Opsin localization  
1002 and rhodopsin photochemistry in a transgenic mouse model of retinitis pigmentosa.  
1003 *Neuroscience.* 1998;87(3):709-17.
- 1004 28. Sakami S, Maeda T, Bereta G, Okano K, Golczak M, Sumaroka A, et al. Probing  
1005 mechanisms of photoreceptor degeneration in a new mouse model of the common form of  
1006 autosomal dominant retinitis pigmentosa due to P23H opsin mutations. *J Biol Chem.*  
1007 2011;286(12):10551-67.
- 1008 29. Naash MI, Hollyfield JG, al-Ubaidi MR, Baehr W. Simulation of human autosomal  
1009 dominant retinitis pigmentosa in transgenic mice expressing a mutated murine opsin gene. *Proc*  
1010 *Natl Acad Sci U S A.* 1993;90(12):5499-503.
- 1011 30. Frederick JM, Krasnoperova NV, Hoffmann K, Church-Kopish J, Ruther K, Howes K, et  
1012 al. Mutant rhodopsin transgene expression on a null background. *Invest Ophthalmol Vis Sci.*  
1013 2001;42(3):826-33.
- 1014 31. Roof DJ, Adamian M, Hayes A. Rhodopsin accumulation at abnormal sites in retinas of  
1015 mice with a human P23H rhodopsin transgene. *Invest Ophthalmol Vis Sci.* 1994;35(12):4049-  
1016 62.
- 1017 32. Kakavand K, Jobling AI, Greferath U, Vessey KA, de longh RU, Fletcher EL.  
1018 Photoreceptor Degeneration in Pro23His Transgenic Rats (Line 3) Involves Autophagic and  
1019 Necroptotic Mechanisms. *Front Neurosci.* 2020;14:581579.
- 1020 33. LaVail MM, Nishikawa S, Steinberg RH, Naash MI, Duncan JL, Trautmann N, et al.  
1021 Phenotypic characterization of P23H and S334ter rhodopsin transgenic rat models of inherited  
1022 retinal degeneration. *Exp Eye Res.* 2018;167:56-90.
- 1023 34. Sakami S, Kolesnikov AV, Kefalov VJ, Palczewski K. P23H opsin knock-in mice reveal a  
1024 novel step in retinal rod disc morphogenesis. *Hum Mol Genet.* 2014;23(7):1723-41.
- 1025 35. Price BA, Sandoval IM, Chan F, Simons DL, Wu SM, Wensel TG, et al. Mislocalization  
1026 and Degradation of Human P23H-Rhodopsin-GFP in a Knockin Mouse Model of Retinitis  
1027 Pigmentosa. *Invest Ophthalmol Vis Sci.* 2011;52(13):9728-36.
- 1028 36. Shaner NC, Lin MZ, McKeown MR, Steinbach PA, Hazelwood KL, Davidson MW, et al.  
1029 Improving the photostability of bright monomeric orange and red fluorescent proteins. *Nat*  
1030 *Methods.* 2008;5(6):545-51.
- 1031 37. Grassart A, Cheng AT, Hong SH, Zhang F, Zenzer N, Feng Y, et al. Actin and dynamin2  
1032 dynamics and interplay during clathrin-mediated endocytosis. *J Cell Biol.* 2014;205(5):721-35.
- 1033 38. Boucrot E, Pick A, Camdere G, Liska N, Evergren E, McMahon HT, et al. Membrane  
1034 fission is promoted by insertion of amphipathic helices and is restricted by crescent BAR  
1035 domains. *Cell.* 2012;149(1):124-36.



- 1036 39. Weber J, Kabakci Z, Chaurasia S, Brunner E, Lehner CF. Chromosome separation  
1037 during *Drosophila* male meiosis I requires separase-mediated cleavage of the homolog  
1038 conjunction protein UNO. *PLoS Genet.* 2020;16(10):e1008928.
- 1039 40. Lodowski KH, Lee R, Ropelewski P, Nemet I, Tian G, Imanishi Y. Signals governing the  
1040 trafficking and mistrafficking of a ciliary GPCR, rhodopsin. *J Neurosci.* 2013;33(34):13621-38.
- 1041 41. Chan F, Bradley A, Wensel TG, Wilson JH. Knock-in human rhodopsin-GFP fusions as  
1042 mouse models for human disease and targets for gene therapy. *Proc Natl Acad Sci U S A.*  
1043 2004;101(24):9109-14.
- 1044 42. Chan F, Hauswirth WW, Wensel TG, Wilson JH. Efficient mutagenesis of the rhodopsin  
1045 gene in rod photoreceptor neurons in mice. *Nucleic Acids Res.* 2011;39(14):5955-66.
- 1046 43. Zheng B, Sage M, Sheppard EA, Jurecic V, Bradley A. Engineering mouse  
1047 chromosomes with Cre-loxP: range, efficiency, and somatic applications. *Mol Cell Biol.*  
1048 2000;20(2):648-55.
- 1049 44. Lan ZJ, Xu X, Cooney AJ. Differential oocyte-specific expression of Cre recombinase  
1050 activity in GDF-9-iCre, Zp3cre, and Msx2Cre transgenic mice. *Biol Reprod.* 2004;71(5):1469-74.
- 1051 45. Trojan P, Krauss N, Choe HW, Giessl A, Pulvermuller A, Wolfrum U. Centrin in retinal  
1052 photoreceptor cells: regulators in the connecting cilium. *Prog Retin Eye Res.* 2008;27(3):237-59.
- 1053 46. Robichaux MA, Potter VL, Zhang Z, He F, Liu J, Schmid MF, et al. Defining the layers of  
1054 a sensory cilium with STORM and cryoelectron nanoscopy. *Proc Natl Acad Sci U S A.*  
1055 2019;116(47):23562-72.
- 1056 47. Gorbatyuk MS, Starr CR, Gorbatyuk OS. Endoplasmic reticulum stress: New insights  
1057 into the pathogenesis and treatment of retinal degenerative diseases. *Prog Retin Eye Res.*  
1058 2020;79:100860.
- 1059 48. Chan P, Stolz J, Kohl S, Chiang WC, Lin JH. Endoplasmic reticulum stress in human  
1060 photoreceptor diseases. *Brain Res.* 2016;1648(Pt B):538-41.
- 1061 49. Athanasiou D, Aguilà M, Bevilacqua D, Novoselov SS, Parfitt DA, Cheetham ME. The  
1062 cell stress machinery and retinal degeneration. *FEBS Lett.* 2013;587(13):2008-17.
- 1063 50. Lin JH, Lavail MM. Misfolded proteins and retinal dystrophies. *Adv Exp Med Biol.*  
1064 2010;664:115-21.
- 1065 51. Newton F, Megaw R. Mechanisms of Photoreceptor Death in Retinitis Pigmentosa.  
1066 *Genes (Basel).* 2020;11(10).
- 1067 52. Wensel TG, Gross AK, Chan F, Sykoudis K, Wilson JH. Rhodopsin-EGFP knock-ins for  
1068 imaging quantal gene alterations. *Vision Res.* 2005;45(28):3445-53.
- 1069 53. Lin JH, Li H, Yasumura D, Cohen HR, Zhang C, Panning B, et al. IRE1 signaling affects  
1070 cell fate during the unfolded protein response. *Science.* 2007;318(5852):944-9.
- 1071 54. Gorbatyuk MS, Knox T, LaVail MM, Gorbatyuk OS, Noorwez SM, Hauswirth WW, et al.  
1072 Restoration of visual function in P23H rhodopsin transgenic rats by gene delivery of BiP/Grp78.  
1073 *Proc Natl Acad Sci U S A.* 2010;107(13):5961-6.
- 1074 55. Aguila M, Bellingham J, Athanasiou D, Bevilacqua D, Duran Y, Maswood R, et al. AAV-  
1075 mediated ERdj5 overexpression protects against P23H rhodopsin toxicity. *Hum Mol Genet.*  
1076 2020;29(8):1310-8.
- 1077 56. Chiang WC, Kroeger H, Sakami S, Messah C, Yasumura D, Matthes MT, et al. Robust  
1078 Endoplasmic Reticulum-Associated Degradation of Rhodopsin Precedes Retinal Degeneration.  
1079 *Mol Neurobiol.* 2015;52(1):679-95.
- 1080 57. Lobanova ES, Finkelstein S, Li J, Travis AM, Hao Y, Klingeborn M, et al. Increased  
1081 proteasomal activity supports photoreceptor survival in inherited retinal degeneration. *Nat*  
1082 *Commun.* 2018;9(1):1738.
- 1083 58. Wen RH, Stanar P, Tam B, Moritz OL. Autophagy in *Xenopus laevis* rod photoreceptors  
1084 is independently regulated by phototransduction and misfolded RHO(P23H). *Autophagy.*  
1085 2019;15(11):1970-89.

- 1086 59. Karam A, Tebbe L, Weber C, Messaddeq N, Morle L, Kessler P, et al. A novel function  
1087 of Huntingtin in the cilium and retinal ciliopathy in Huntington's disease mice. *Neurobiol Dis.*  
1088 2015;80:15-28.
- 1089 60. Omori Y, Chaya T, Katoh K, Kajimura N, Sato S, Muraoka K, et al. Negative regulation  
1090 of ciliary length by ciliary male germ cell-associated kinase (Mak) is required for retinal  
1091 photoreceptor survival. *Proc Natl Acad Sci U S A.* 2010.
- 1092 61. Comitato A, Schirotti D, Montanari M, Marigo V. Calpain Activation Is the Major Cause of  
1093 Cell Death in Photoreceptors Expressing a Rhodopsin Misfolding Mutation. *Mol Neurobiol.*  
1094 2020;57(2):589-99.
- 1095 62. Mao H, James T, Jr., Schwein A, Shabashvili AE, Hauswirth WW, Gorbatyuk MS, et al.  
1096 AAV delivery of wild-type rhodopsin preserves retinal function in a mouse model of autosomal  
1097 dominant retinitis pigmentosa. *Hum Gene Ther.* 2011;22(5):567-75.
- 1098 63. Cideciyan AV, Sudharsan R, Dufour VL, Massengill MT, Iwabe S, Swider M, et al.  
1099 Mutation-independent rhodopsin gene therapy by knockdown and replacement with a single  
1100 AAV vector. *Proc Natl Acad Sci U S A.* 2018;115(36):E8547-E56.
- 1101 64. Li P, Kleinstiver BP, Leon MY, Prew MS, Navarro-Gomez D, Greenwald SH, et al. Allele-  
1102 Specific CRISPR-Cas9 Genome Editing of the Single-Base P23H Mutation for Rhodopsin-  
1103 Associated Dominant Retinitis Pigmentosa. *CRISPR J.* 2018;1:55-64.
- 1104 65. Latella MC, Di Salvo MT, Cocchiarella F, Benati D, Grisendi G, Comitato A, et al. In vivo  
1105 Editing of the Human Mutant Rhodopsin Gene by Electroporation of Plasmid-based  
1106 CRISPR/Cas9 in the Mouse Retina. *Molecular therapy Nucleic acids.* 2016;5(11):e389.
- 1107 66. Giannelli SG, Luoni M, Castoldi V, Massimino L, Cabassi T, Angeloni D, et al.  
1108 Cas9/sgRNA selective targeting of the P23H Rhodopsin mutant allele for treating retinitis  
1109 pigmentosa by intravitreal AAV9.PHP.B-based delivery. *Hum Mol Genet.* 2018;27(5):761-79.
- 1110 67. Yao J, Qiu Y, Frontera E, Jia L, Khan NW, Klionsky DJ, et al. Inhibiting autophagy  
1111 reduces retinal degeneration caused by protein misfolding. *Autophagy.* 2018;14(7):1226-38.
- 1112 68. Comitato A, Di Salvo MT, Turchiano G, Montanari M, Sakami S, Palczewski K, et al.  
1113 Dominant and recessive mutations in rhodopsin activate different cell death pathways. *Hum Mol*  
1114 *Genet.* 2016;25(13):2801-12.
- 1115 69. Nakamura PA, Shimchuk AA, Tang S, Wang Z, DeGolier K, Ding S, et al. Small  
1116 molecule Photoregulin3 prevents retinal degeneration in the Rho(P23H) mouse model of retinitis  
1117 pigmentosa. *Elife.* 2017;6.
- 1118 70. Vent-Schmidt RYJ, Wen RH, Zong Z, Chiu CN, Tam BM, May CG, et al. Opposing  
1119 Effects of Valproic Acid Treatment Mediated by Histone Deacetylase Inhibitor Activity in Four  
1120 Transgenic *X. laevis* Models of Retinitis Pigmentosa. *J Neurosci.* 2017;37(4):1039-54.
- 1121 71. de Vries WN, Binns LT, Fancher KS, Dean J, Moore R, Kemler R, et al. Expression of  
1122 Cre recombinase in mouse oocytes: a means to study maternal effect genes. *Genesis.*  
1123 2000;26(2):110-2.
- 1124 72. Lan ZJ, Gu P, Xu X, Jackson KJ, DeMayo FJ, O'Malley BW, et al. GCNF-dependent  
1125 repression of BMP-15 and GDF-9 mediates gamete regulation of female fertility. *EMBO J.*  
1126 2003;22(16):4070-81.
- 1127 73. Molday RS, MacKenzie D. Monoclonal antibodies to rhodopsin: characterization, cross-  
1128 reactivity, and application as structural probes. *Biochemistry.* 1983;22(3):653-60.
- 1129 74. Preibisch S, Saalfeld S, Tomancak P. Globally optimal stitching of tiled 3D microscopic  
1130 image acquisitions. *Bioinformatics.* 2009;25(11):1463-5.
- 1131 75. Schindelin J, Arganda-Carreras I, Frise E, Kaynig V, Longair M, Pietzsch T, et al. Fiji: an  
1132 open-source platform for biological-image analysis. *Nat Methods.* 2012;9(7):676-82.
- 1133 76. He F, Nichols RM, Kailasam L, Wensel TG, Agosto MA. Critical Role for  
1134 Phosphatidylinositol-3 Kinase Vps34/PIK3C3 in ON-Bipolar Cells. *Invest Ophthalmol Vis Sci.*  
1135 2019;60(8):2861-74.



- 1136 77. Chiang WC, Kroeger H, Sakami S, Messah C, Yasumura D, Matthes MT, et al. Robust  
1137 Endoplasmic Reticulum-Associated Degradation of Rhodopsin Precedes Retinal Degeneration.  
1138 Molecular Neurobiology. 2015;52(1):679-95.  
1139 78. Tawfik A, Smith SB. Increased ER stress as a mechanism of retinal neurovasculopathy  
1140 in mice with severe hyperhomocysteinemia. Austin journal of clinical ophthalmology.  
1141 2014;1(5):1023-  
1142
